# Supplementary material for: Optimization of Covalent MKK7 Inhibitors via Crude Nanomole-Scale Libraries
Source: PubMed Central journal article supplement (PMC9376956; doi:10.1021/acs.jmedchem.1c02206), 2022-07-30

## Supporting Information

### Optimization of covalent MKK7 inhibitors via crude nanomole-scale libraries

Paul Gehrtz<sup>1,2,#</sup>, Shir Marom<sup>1,#</sup>, Mike Bührmann<sup>3,4,#</sup>, Julia Hardick<sup>3,4,#</sup>, Silke Kleinbölting<sup>3,4</sup>, Amit Shraga<sup>1,5</sup>, Christian Dubiella<sup>1,6</sup>, Ronen Gabizon<sup>1</sup>, Jan N. Wiese<sup>3,4</sup>, Matthias P. Müller<sup>3,4</sup>, Galit Cohen<sup>7</sup>, Ilana Babaev<sup>7</sup>, Khriesto Shurrush<sup>7</sup>, Liat Avram<sup>8</sup>, Efrat Resnick<sup>1</sup>, Haim Barr<sup>7</sup>, Daniel Rauh<sup>3,4,\*</sup>, Nir London<sup>1,\*</sup>

<sup>1</sup> Department of Chemical and Structural Biology, Weizmann Institute of Science, 7610001 Rehovot, Israel

<sup>3</sup> Department of Chemistry and Chemical Biology, TU Dortmund University, Otto-Hahn-Strasse 4a, 44227, Dortmund, Germany.

<sup>4</sup> Drug Discovery Hub Dortmund (DDHD) am Zentrum für integrierte Wirkstoffforschung (ZIW), 44227 Dortmund, Germany

<sup>7</sup> The Nancy and Stephen Grand Israel National Center for Personalized Medicine, Weizmann Institute of Science, 7610001 Rehovot, Israel.

<sup>8</sup> Department of Chemical Research Support, Weizmann Institute of Science, 7610001, Rehovot, Israel

# These authors contributed equally.

\* Corresponding:

N.L.: [nir.london@weizmann.ac.il](mailto:nir.london@weizmann.ac.il)

D.R.: [daniel.rauh@tu-dortmund.de](mailto:daniel.rauh@tu-dortmund.de)

Keywords: CuAAC, Click-Chemistry, Covalent Inhibitors, MKK7, High-Throughput Chemistry

## Contents

|                                                                                                                              |         |
|------------------------------------------------------------------------------------------------------------------------------|---------|
| <b>Figure S1.</b> The binding modes of alkynes <b>1</b> and <b>2</b> in the ATP binding site of MKK7                         | S2      |
| <b>Figure S2.</b> Plot of cLogS of series <b>1</b> members and their associated p-JNK levels                                 | S3      |
| <b>Figure S3.</b> Plot of cLogP of series <b>1</b> members and their associated p-JNK levels                                 | S3      |
| <b>Figure S4.</b> Plot of tPSA of series <b>1</b> members and their associated p-JNK levels                                  | S4      |
| <b>Figure S5.</b> Plot of cLogS of series <b>2</b> members and their associated p-JNK levels                                 | S4      |
| <b>Figure S6.</b> Plot of cLogP of series <b>2</b> members and their associated p-JNK levels                                 | S5      |
| <b>Figure S7.</b> Plot of tPSA of series <b>2</b> members and their associated p-JNK levels                                  | S5      |
| <b>Figure S8.</b> Intact protein LC/MS labelling experiment of re-synthesized compounds                                      | S6      |
| <b>Figure S9.</b> Omit maps of the co-crystallized MKK7 inhibitors                                                           | S6      |
| <b>Figure S10.</b> Dose response western blots with p-c-Jun                                                                  | S7-S8   |
| <b>Figure S11.</b> A model of compound <b>1e</b> based on the structure of MKK7 in complex with <b>1k</b>                    | S9      |
| <b>Figure S12.</b> Biphasic in vitro kinase inhibition behavior by alkyne <b>2</b> .                                         | S9      |
| <b>Figure S13.</b> GSH consumption assay of selected compounds <b>1</b> , <b>1b</b> , <b>1k</b> , <b>2</b> , and <b>2b</b> . | S10     |
| <b>Figure S14.</b> Pull down proteomics analysis of alkynes <b>1</b> and <b>2</b> .                                          | S11     |
| <b>Figure S15.</b> Chemical structure of compound <b>4</b> .                                                                 | S11     |
| <b>Table S1.</b> Crystallographic statistics of MKK7 in complex with triazolyl inhibitor derivatives.                        | S12     |
| <b>HPLC and NMR spectra of reported compounds</b>                                                                            | S13-S52 |

## Supplementary Figures

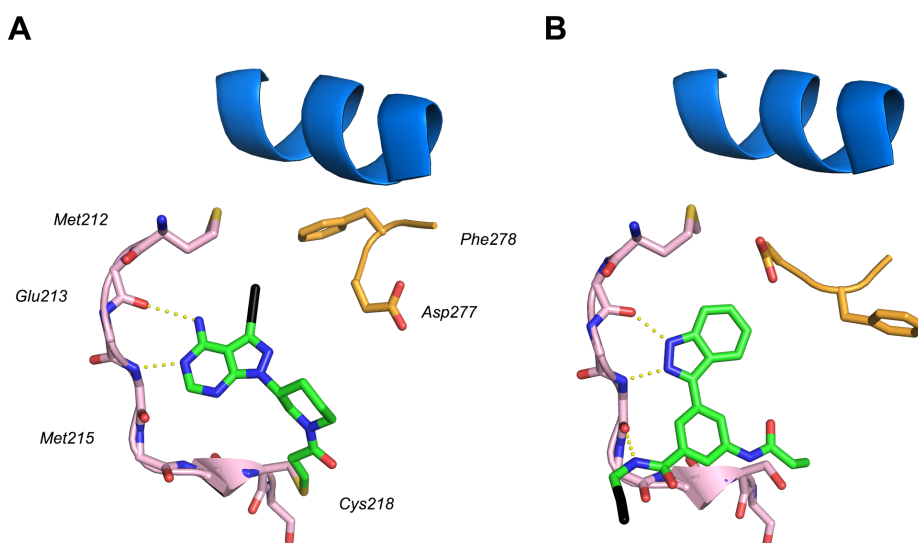

**Figure S1.** The binding modes of alkynes **1** and **2** in the ATP binding site of MKK7. (A) **1** co-crystallized in complex with MKK7 (PDB: 6IB0), where the alkyne (black) is protruding into the back pocket. (B) **2** co-crystallized in complex with MKK7 (PDB: 7CBX), where the alkyne (black) is pointing outside the binding pocket towards the solvent-exposed region.

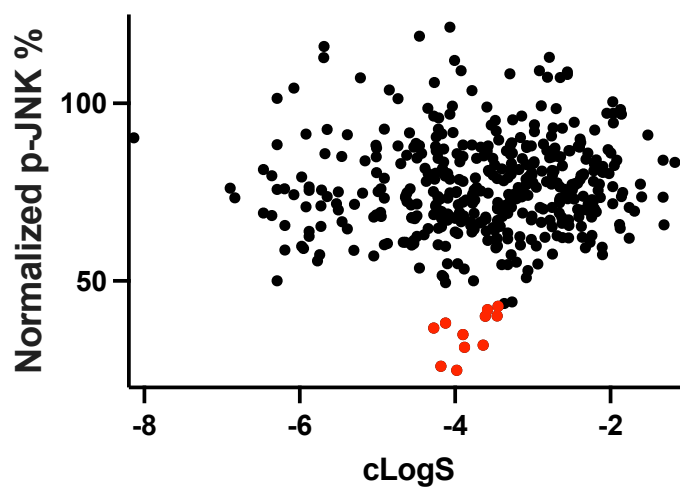

**Figure S2.** Plot of cLogS of series 1 members and their associated p-JNK levels determined via an ICW assay (13.8  $\mu$ M, 2 h, U2OS cells). Top ten compounds from the series are highlighted in red.

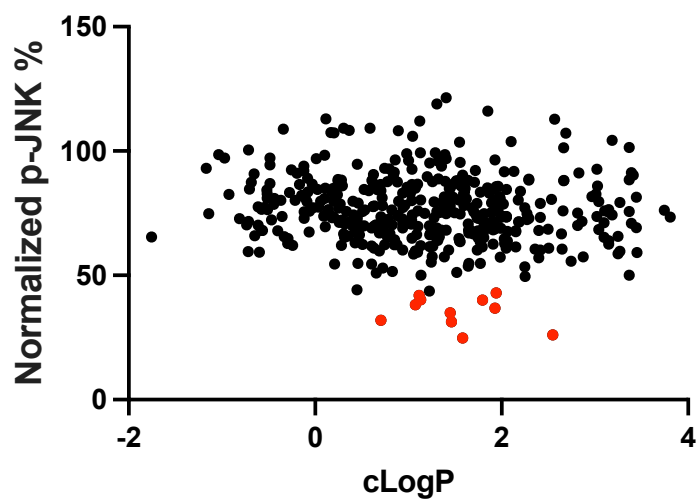

**Figure S3.** Plot of cLogP of series 1 members and their associated p-JNK levels determined via an ICW assay (13.8  $\mu$ M, 2 h, U2OS cells). Top ten compounds from the series are highlighted in red.

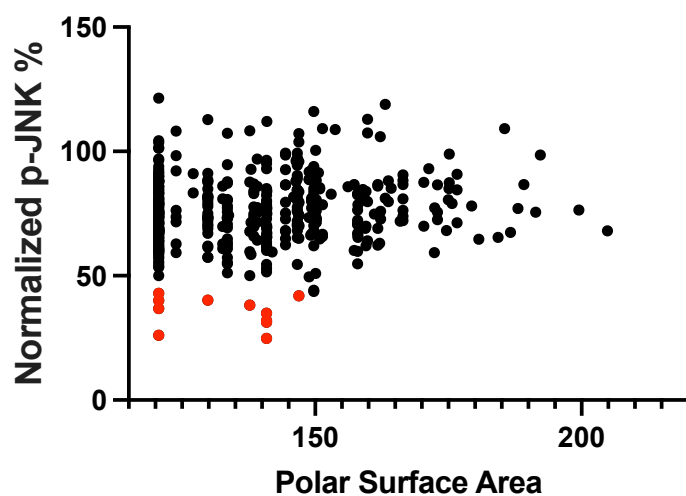

**Figure S4.** Plot of tPSA of series 1 members and their associated p-JNK levels determined via an ICW assay (13.8  $\mu$ M, 2 h, U2OS cells). Top ten compounds from the series are highlighted in red.

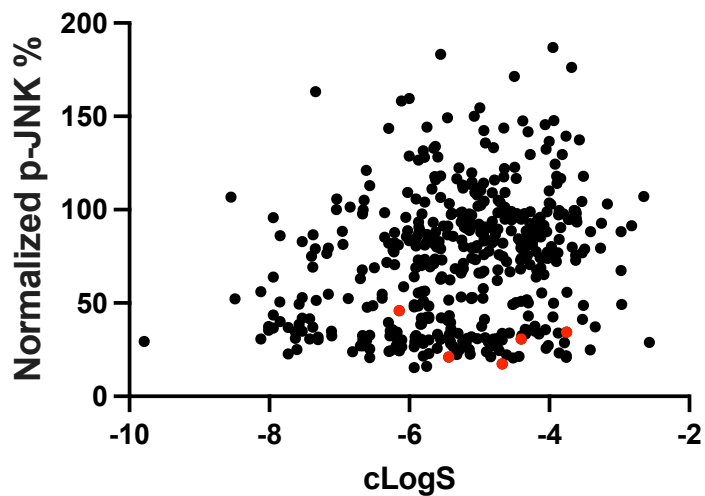

**Figure S5.** Plot of cLogS of series 2 members and their associated p-JNK levels determined via an ICW assay (10  $\mu$ M, 2 h, U2OS cells). Selected five compounds from the series are highlighted in red.

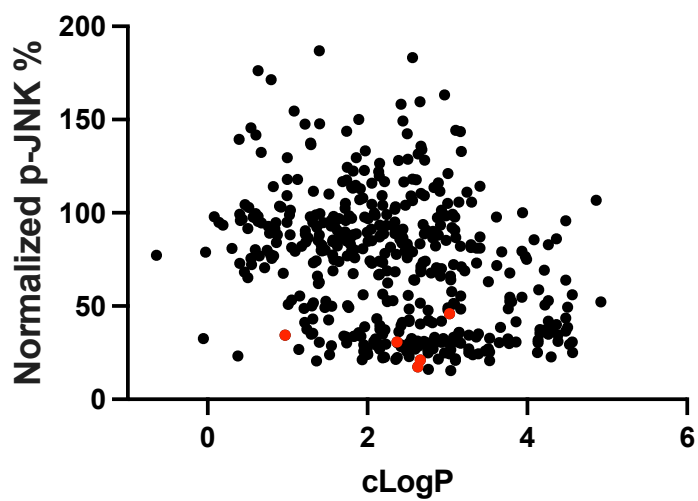

**Figure S6.** Plot of cLogP of series 2 members and their associated p-JNK levels determined via an ICW assay (10  $\mu$ M, 2 h, U2OS cells). Selected five compounds from the series are highlighted in red.

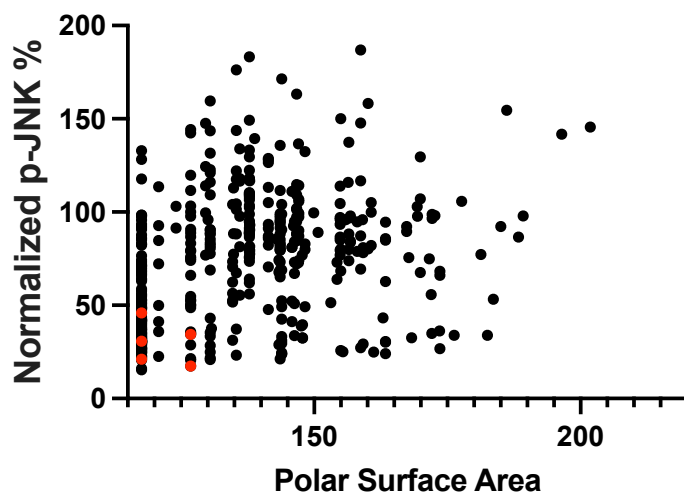

**Figure S7.** Plot of tPSA of series 2 members and their associated p-JNK levels determined via an ICW assay (13.8  $\mu$ M, 2 h, U2OS cells). Selected five compounds from the series are highlighted in red.

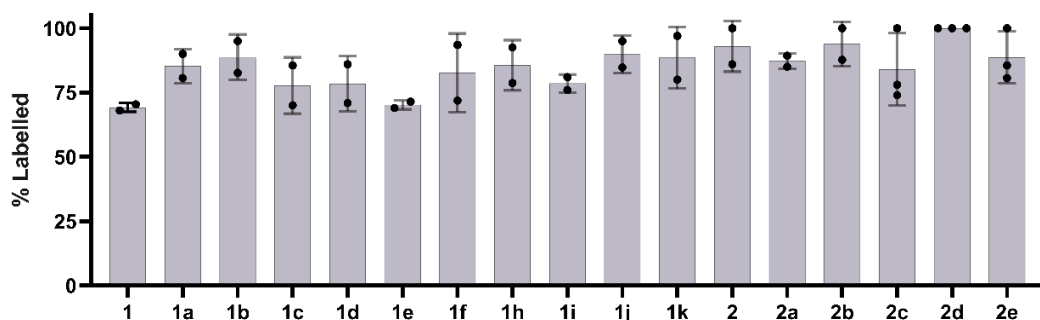

**Figure S8.** Intact protein LC/MS labelling experiment of re-synthesized compounds derived from top crude screening hits. Reaction conditions: 2  $\mu$ M compound, 2  $\mu$ M protein, 10 min, 4  $^{\circ}$ C, quenched with formic acid to a final concentration of 0.4% (v/v). In series **1**, all except compounds **1e**, showed improved binding abilities compared to precursor **1** with over 75% labelling. In series **2**, all compounds showed high binding abilities of over 75%.

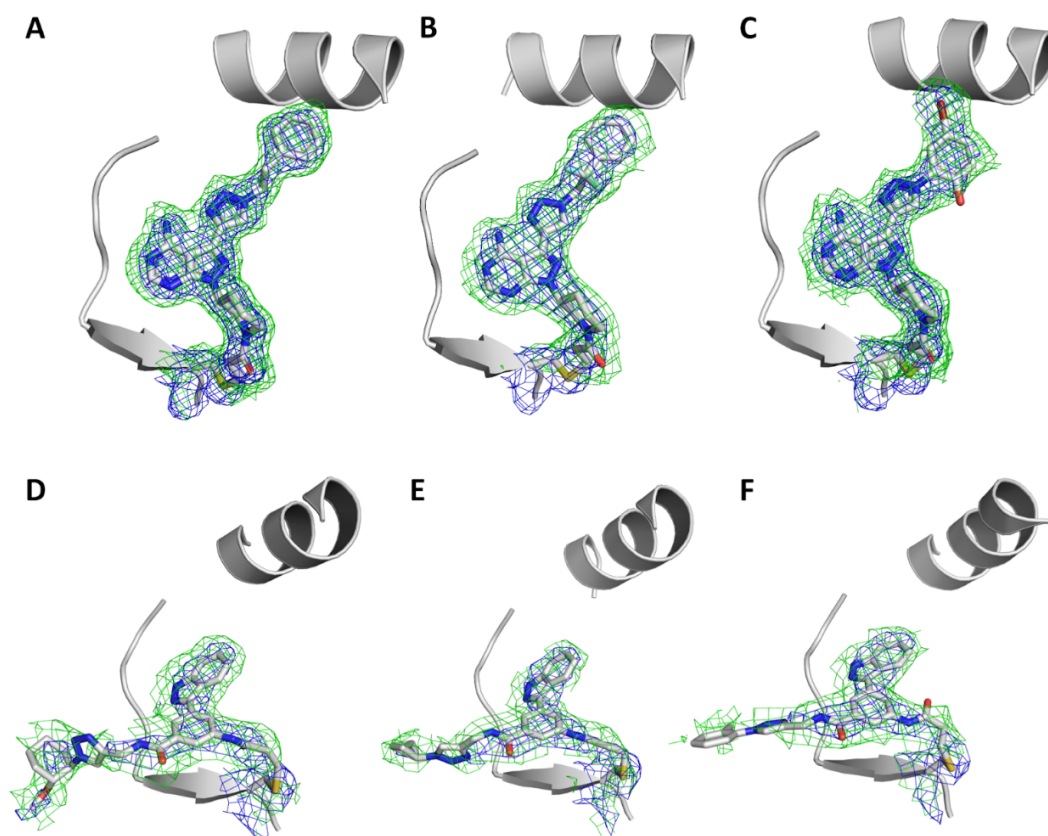

**Figure S9.** Omit maps of the co-crystallized MKK7 inhibitors. Performing a simulated annealing refinement, mFo-DFc omit maps (green, contoured at  $2.5\sigma$ ) were calculated for (A) **1h** (B) **1k**, (C) **1a**, (D) **2b**, (E) **2d**, and (F) **2c** as well as for the targeted Cys218. 2Fo-Fc maps for the ligands and Cys218 were contoured at  $1.0\sigma$  (blue). Maps indicate partial occupancy for the compounds of series **2** in the area of the solvent-exposed triazolyl moiety.

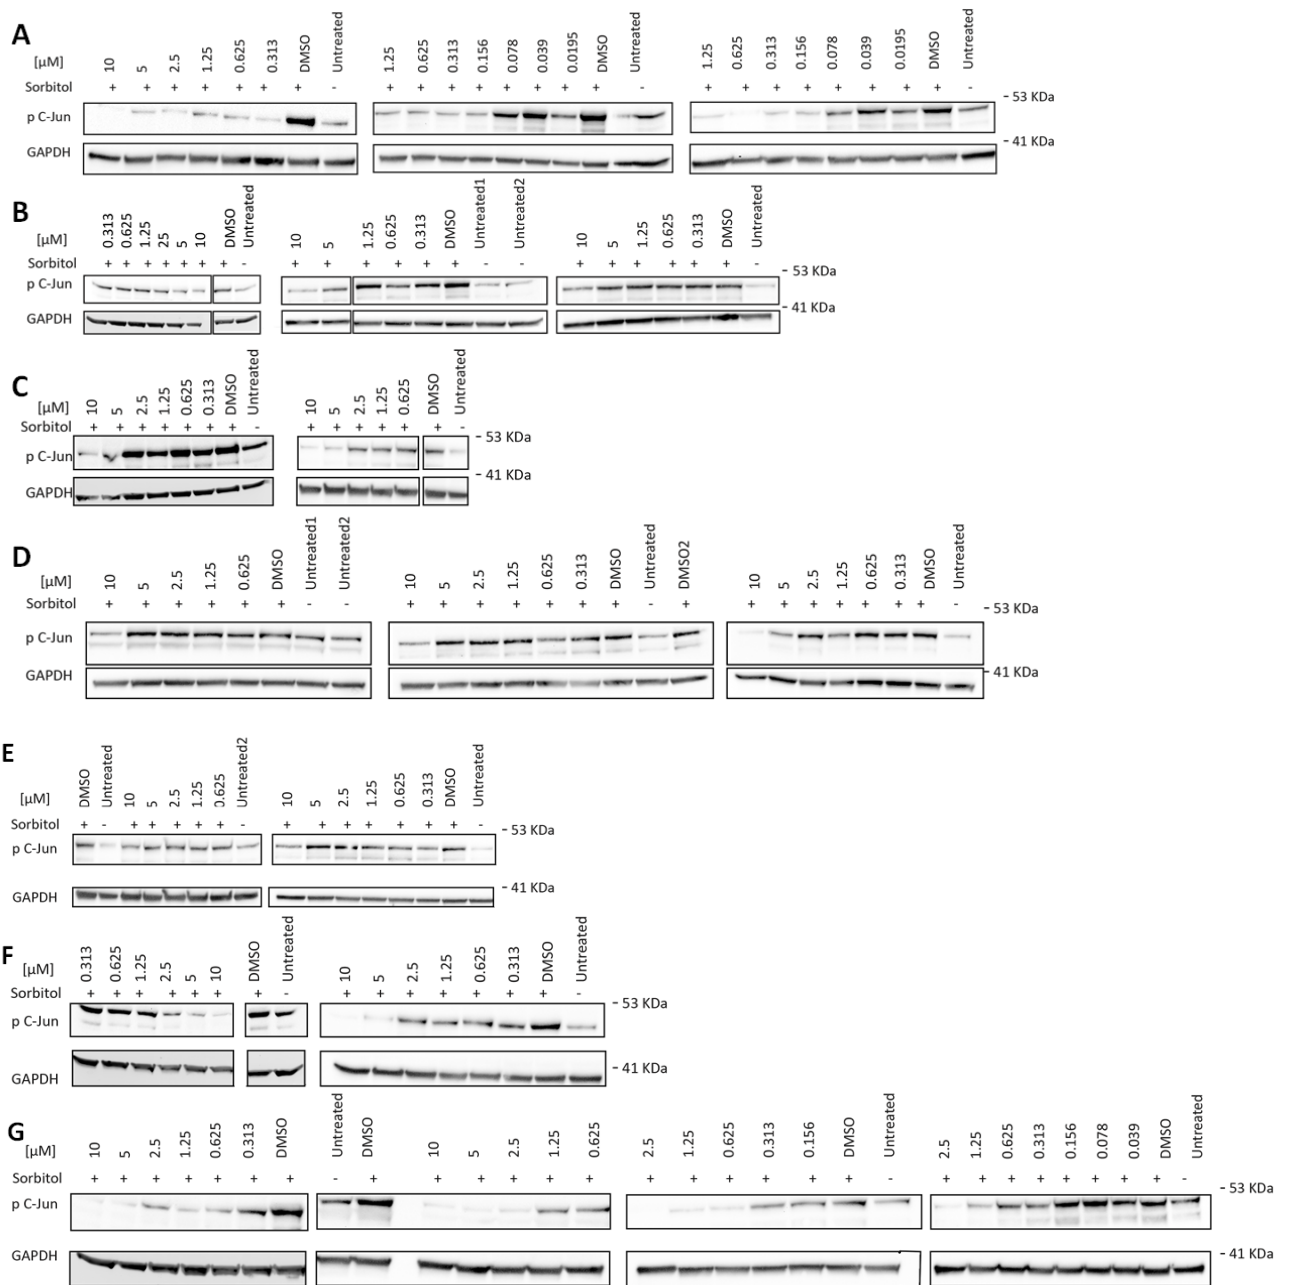

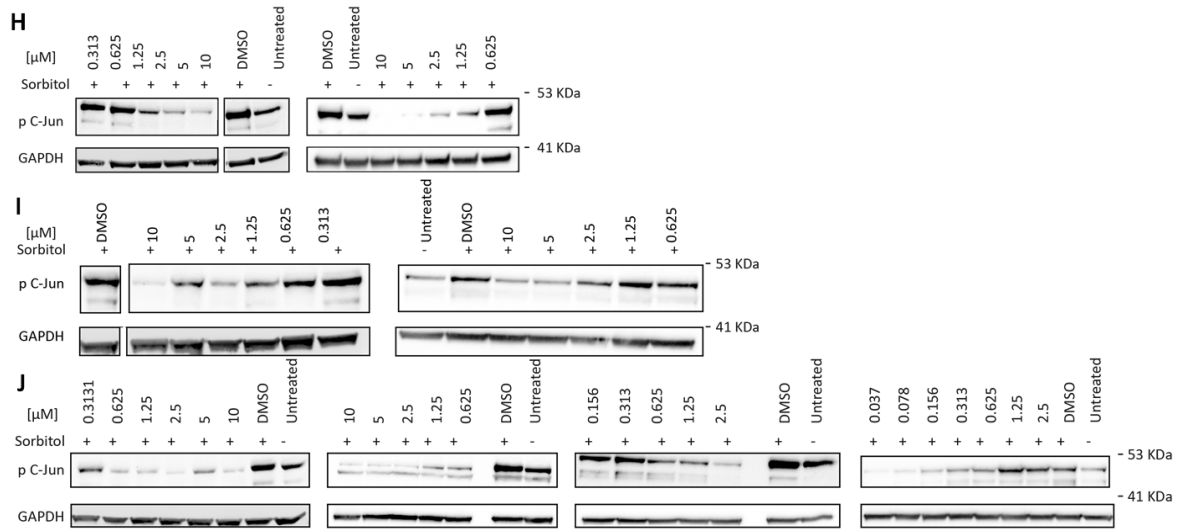

**Figure S10.** Dose response western blot with p-c-Jun as the readout and GAPDH as the housekeeping gene for normalization. (A) **2**, (B) **2a**, (C) **2b**, (D) **2c**, (E) **1**, (F) **1a**, (G) **1b**, (H) **1d**, (I) **1e**, (J) **1k**.



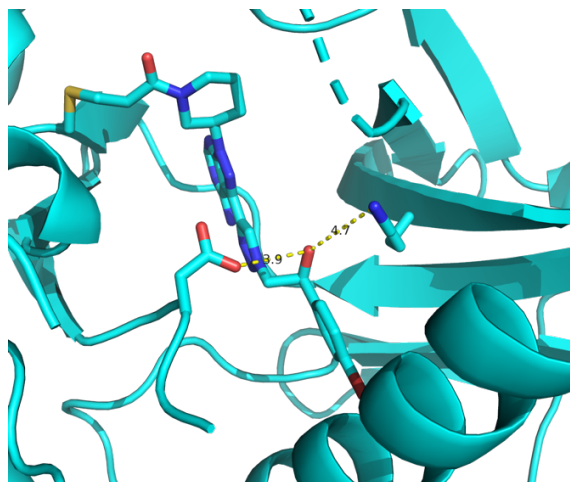

**Figure S11.** A model of compound **1e** based on the co-crystal structure of MKK7 in complex with **1k** shows the hydroxy side-chain may form a hydrogen bond with either Asp277 (similar to **1a**; see Fig. 4), or with Lys155. Note that the side-chains were not remodeled and may in fact adopt a rotamer that places closer to the hydroxy moiety.

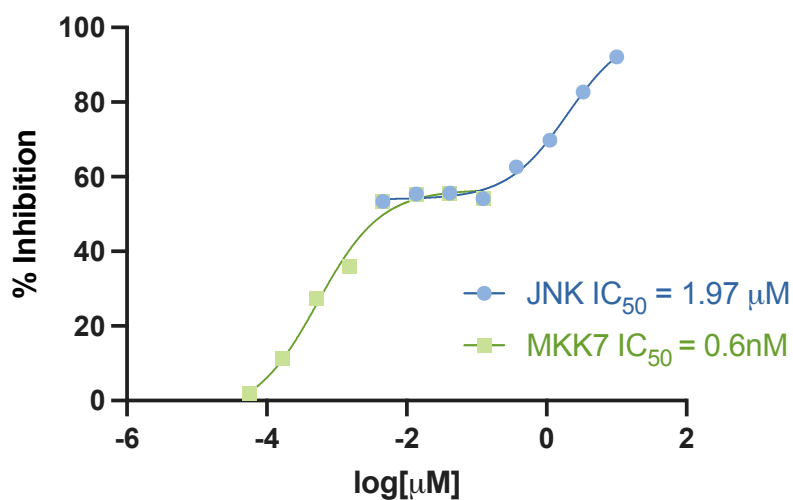

**Figure S12.** Biphasic in vitro kinase inhibition behavior by alkyne **2**. In a coupled JNK/ MKK7 in vitro kinase activity assay, alkyne **2** shows a biphasic inhibition curve. Each sigmoidal curve can be fitted separately with very potent inhibition of MKK7 at lower concentrations ( $IC_{50} = 0.6\text{nM}$ ;  $R^2=0.986$ ) and likely weak inhibition of JNK at higher concentrations ( $IC_{50}=1.975\ \mu\text{M}$ ;  $R^2=0.966$ ).

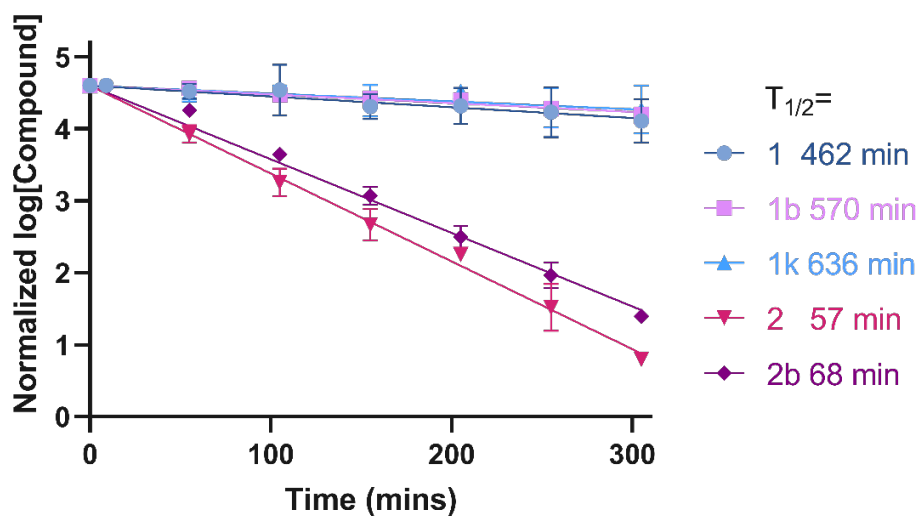

**Figure S13.** GSH consumption assay of selected compounds **1**, **1b**, **1k**, **2**, and **2b**. The assay was done at 37 °C using 100  $\mu$ M reference compound 4-nitrobenzotrile, 100  $\mu$ M of tested compounds and 5 mM GSH. The buffer was 90% PBS and 10% DMF. Every 50 min, the vial was taken from the incubator, shaken well, and then 50  $\mu$ L was taken and analyzed in the LC/MS. The series **1** compounds were significantly more stable and less reactive than **2** and **2b**. **2b** appeared slightly less reactive than the scaffold **2**.

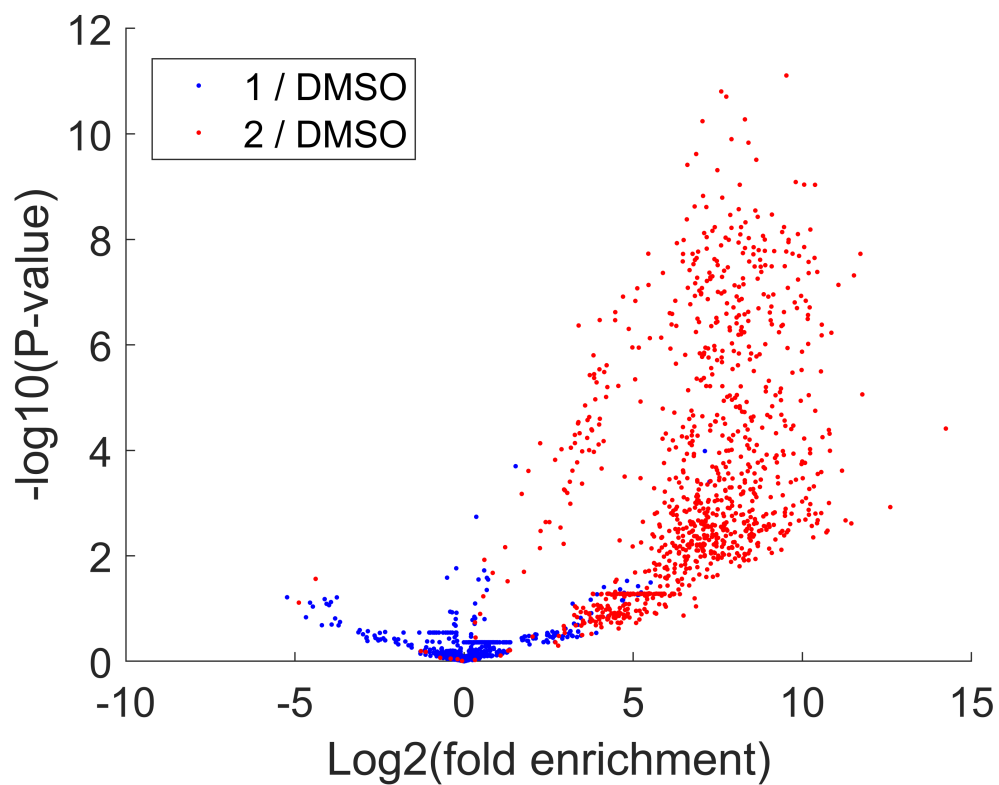

**Figure S14.** Pull down proteomics analysis of alkynes **1** and **2**. Volcano plot for proteins identified in pull-down proteomics experiments using molecules **1** and **2**, the x-axis shows Log2 fold enrichment of proteins detected in samples treated with either alkyne compared to DMSO. The y-axis shows the significance of the difference.

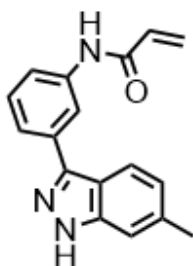

**Figure S15.** Chemical structure of compound **4**.

## Supplementary Tables

|                                      | 1a<br>(PDB:<br>7OVK)                           | 1h<br>(PDB:<br>7OVI)                           | 1k<br>(PDB:<br>7OVJ)                           | 2a<br>(PDB:<br>7OVL)                           | 2b<br>(PDB:<br>7OVN)                           | 2c<br>(PDB:<br>7OVM)                           |
|--------------------------------------|------------------------------------------------|------------------------------------------------|------------------------------------------------|------------------------------------------------|------------------------------------------------|------------------------------------------------|
| <b>Data collection</b>               |                                                |                                                |                                                |                                                |                                                |                                                |
| Space group                          | P 2 <sub>1</sub> 2 <sub>1</sub> 2 <sub>1</sub> | P 2 <sub>1</sub> 2 <sub>1</sub> 2 <sub>1</sub> | P 2 <sub>1</sub> 2 <sub>1</sub> 2 <sub>1</sub> | P 2 <sub>1</sub> 2 <sub>1</sub> 2 <sub>1</sub> | P 2 <sub>1</sub> 2 <sub>1</sub> 2 <sub>1</sub> | P 2 <sub>1</sub> 2 <sub>1</sub> 2 <sub>1</sub> |
| <b>Cell dimensions</b>               |                                                |                                                |                                                |                                                |                                                |                                                |
| a, b, c (Å)                          | 61.72,<br>68.49,<br>83.99                      | 61.05,<br>68.80,<br>83.22                      | 61.08,<br>68.09,<br>85.08                      | 60.23,<br>67.68,<br>84.73                      | 60.91,<br>69.21,<br>84.29                      | 60.65,<br>68.90,<br>84.08                      |
| α, β, γ (°)                          | 90, 90, 90                                     | 90, 90, 90                                     | 90, 90, 90                                     | 90, 90, 90                                     | 90, 90, 90                                     | 90, 90, 90                                     |
| Resolution (Å)                       | 50.0 – 2.05<br>(2.15 –<br>2.05)                | 50.0 – 1.95<br>(2.05 –<br>1.95)                | 50.0 – 2.35<br>(2.40 –<br>2.35)                | 50.0 – 2.90<br>(3.00 –<br>2.90)                | 50.0 – 2.90<br>(3.00 –<br>2.90)                | 50.0 – 2.90<br>(3.00 –<br>2.90)                |
| R <sub>meas</sub> (%)                | 6.9 (128.1)                                    | 5.2 (157.3)                                    | 7.1 (94.2)                                     | 11.2<br>(151.1)                                | 18.2<br>(158.1)                                | 11.0<br>(144.9)                                |
| I/σI                                 | 19.69<br>(2.23)                                | 23.53<br>(1.55)                                | 23.30<br>(3.21)                                | 15.00<br>(1.57)                                | 15.61<br>(2.55)                                | 17.65<br>(2.18)                                |
| CC <sub>1/2</sub>                    | 99.9 (79.8)                                    | 100 (67.9)                                     | 99.9 (88.4)                                    | 99.9 (75.7)                                    | 99.8 (79.7)                                    | 99.9 (81.3)                                    |
| Completeness (%)                     | 100 (100)                                      | 99.5 (100)                                     | 100 (100)                                      | 100 (100)                                      | 99.7 (100)                                     | 100 (100)                                      |
| Redundancy                           | 13.37<br>(13.87)                               | 13.00<br>(12.29)                               | 13.22<br>(13.91)                               | 12.99<br>(13.66)                               | 13.13<br>(12.78)                               | 13.14<br>(13.84)                               |
| <b>Refinement</b>                    |                                                |                                                |                                                |                                                |                                                |                                                |
| Resolution (Å)                       | 45.47 –<br>2.05                                | 49.74 –<br>1.95                                | 45.66 –<br>2.35                                | 49.09 –<br>2.90                                | 45.72 –<br>2.90                                | 49.19 –<br>2.90                                |
| No. reflections                      | 22883                                          | 26461                                          | 15130                                          | 8083                                           | 8276                                           | 8217                                           |
| R <sub>work</sub> /R <sub>free</sub> | 21.67/24.4<br>4                                | 21.12/25.0<br>4                                | 20.38/24.4<br>5                                | 24.83/27.0<br>3                                | 22.34/25.7<br>2                                | 22.98/28.5<br>8                                |
| <b>No. atoms</b>                     |                                                |                                                |                                                |                                                |                                                |                                                |
| Protein                              | 2062                                           | 2125                                           | 2051                                           | 2163                                           | 2202                                           | 2177                                           |
| Ligand/ion                           | 33                                             | 35                                             | 39                                             | 37                                             | 36                                             | 34                                             |
| Water                                | 83                                             | 77                                             | 40                                             | 3                                              | 0                                              | 1                                              |
| <b>B-factors</b>                     |                                                |                                                |                                                |                                                |                                                |                                                |
| Protein                              | 58.38                                          | 60.31                                          | 57.61                                          | 99.66                                          | 72.46                                          | 84.97                                          |
| Ligand/ion                           | 50.21                                          | 70.69                                          | 60.85                                          | 102.79                                         | 96.82                                          | 105.81                                         |
| Water                                | 56.71                                          | 56.74                                          | 61.97                                          | 75.15                                          | -                                              | 74.77                                          |
| <b>rms deviations</b>                |                                                |                                                |                                                |                                                |                                                |                                                |
| Bond lengths (Å)                     | 0.009                                          | 0.002                                          | 0.001                                          | 0.002                                          | 0.006                                          | 0.002                                          |
| Bond angles (°)                      | 0.945                                          | 0.422                                          | 0.448                                          | 0.520                                          | 0.667                                          | 0.557                                          |
| <b>Wavelength (Å)</b>                |                                                |                                                |                                                |                                                |                                                |                                                |
| Wavelength (Å)                       | 0.9999                                         | 0.9999                                         | 0.9197                                         | 0.9197                                         | 0.9197                                         | 0.9197                                         |
| <b>Temperature (K)</b>               |                                                |                                                |                                                |                                                |                                                |                                                |
| Temperature (K)                      | 100                                            | 100                                            | 100                                            | 100                                            | 100                                            | 100                                            |
| <b>X-ray source</b>                  |                                                |                                                |                                                |                                                |                                                |                                                |
| X-ray source                         | PXII at SLS,<br>Villigen, CH                   | PXII at SLS,<br>Villigen, CH                   | PXII at SLS,<br>Villigen, CH                   | PXII at SLS,<br>Villigen, CH                   | PXII at SLS,<br>Villigen, CH                   | PXII at SLS,<br>Villigen, CH                   |
| <b>Detector</b>                      |                                                |                                                |                                                |                                                |                                                |                                                |
| Detector                             | EIGER2<br>16M                                  | EIGER2<br>16M                                  | EIGER2<br>16M                                  | EIGER2<br>16M                                  | EIGER2<br>16M                                  | EIGER2<br>16M                                  |
| <b>Ramachandran plot</b>             |                                                |                                                |                                                |                                                |                                                |                                                |
| <b>Residues in</b>                   |                                                |                                                |                                                |                                                |                                                |                                                |
| favored regions                      | 99.22 %                                        | 97.76 %                                        | 97.60 %                                        | 97.42 %                                        | 98.55 %                                        | 98.18 %                                        |
| allowed regions                      | 0.78 %                                         | 2.24 %                                         | 2.40 %                                         | 2.21 %                                         | 1.09 %                                         | 1.82 %                                         |
| outlier regions                      | 0.00 %                                         | 0.00 %                                         | 0.00 %                                         | 0.37 %                                         | 0.36 %                                         | 0.00 %                                         |

**Table S1.** Crystallographic statistics of MKK7 in complex with triazolyl inhibitor derivatives. Statistics for co-crystals with compounds **1a**, **1h**, **1k**, **2a**, **2b**, **2c** (PDB: 7OVI, 7OVJ, 7OVK, 7OVL, 7OVM, 7OVN). Values in parenthesis refer to the highest resolution shell.

## HPLC and NMR spectra of reported compounds

**(R)-1-(3-(4-amino-3-(1-(4-bromo-2-hydroxyphenyl)-1H-1,2,3-triazol-4-yl)-1H-pyrazolo[3,4-d]pyrimidin-1-yl)piperidin-1-yl)prop-2-en-1-one (1a)**

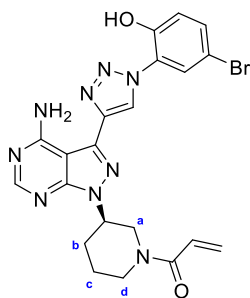

LC-MS chromatogram, detection at 280 nm

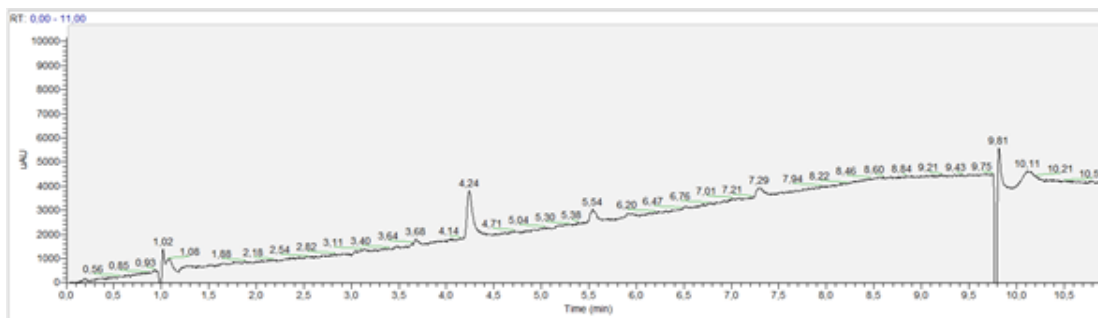

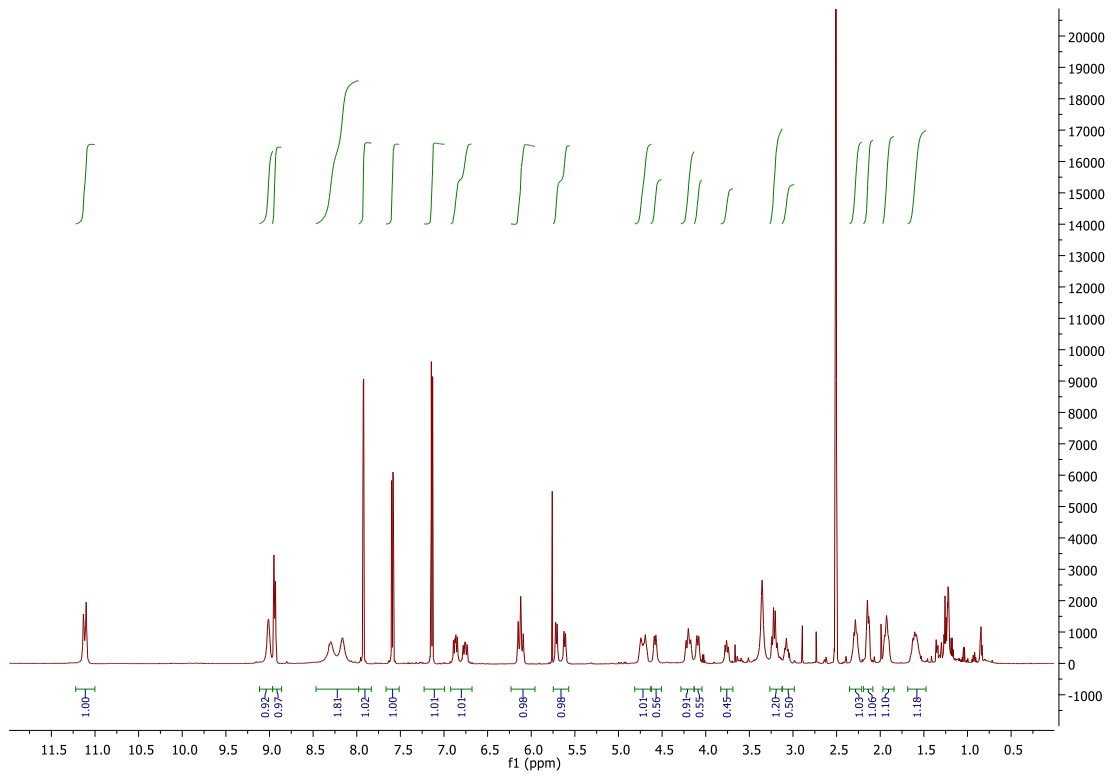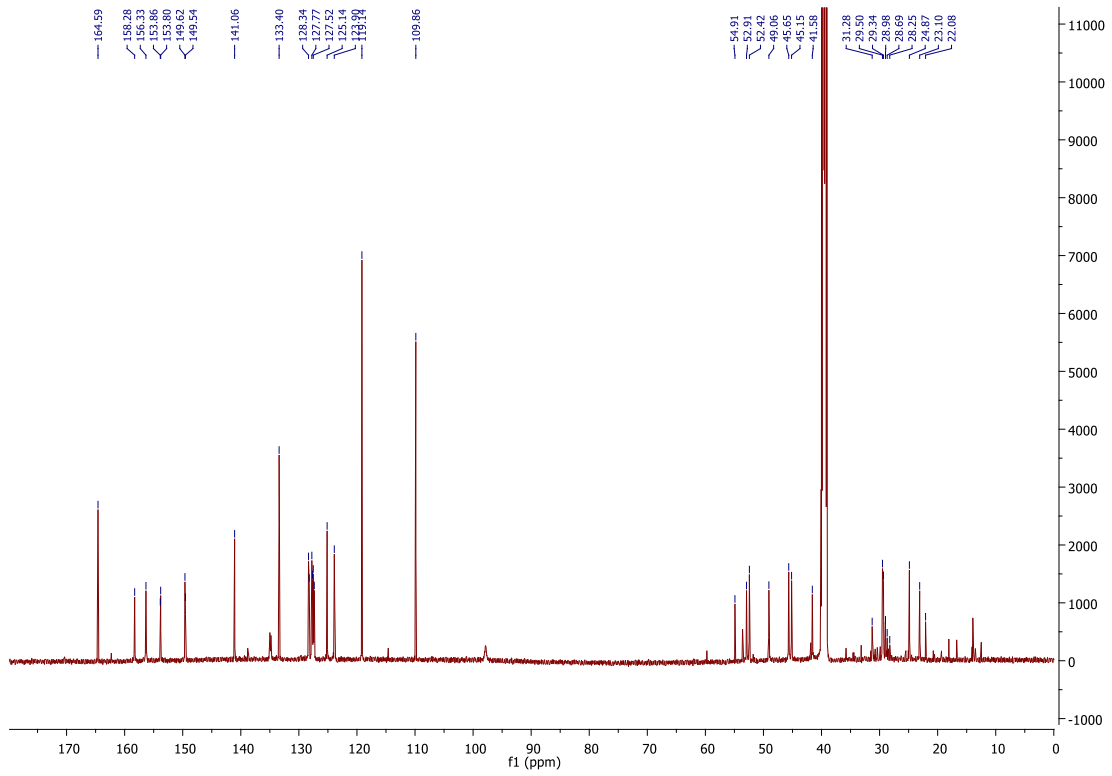

**(R)-1-(3-(4-amino-3-(1-(2-(4-chlorophenyl)-2,2-difluoroethyl)-1H-1,2,3-triazol-4-yl)-1H-pyrazolo[3,4-d]pyrimidin-1-yl)piperidin-1-yl)prop-2-en-1-one (1b)**

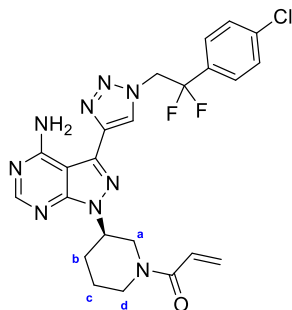

LC-MS chromatogram, detection at 280 nm

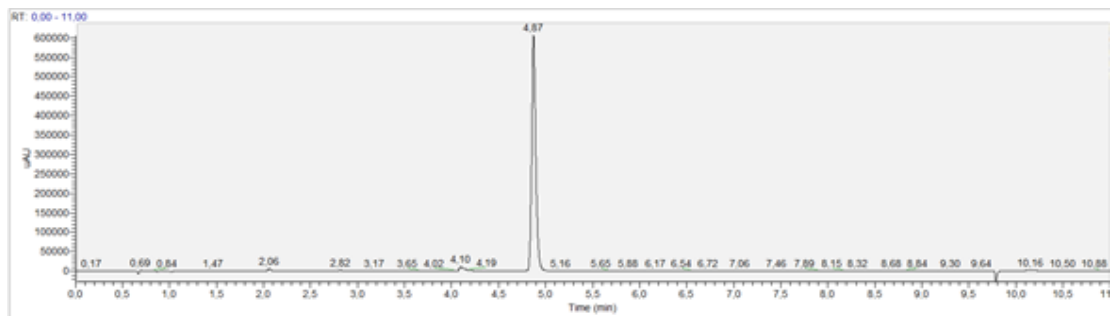

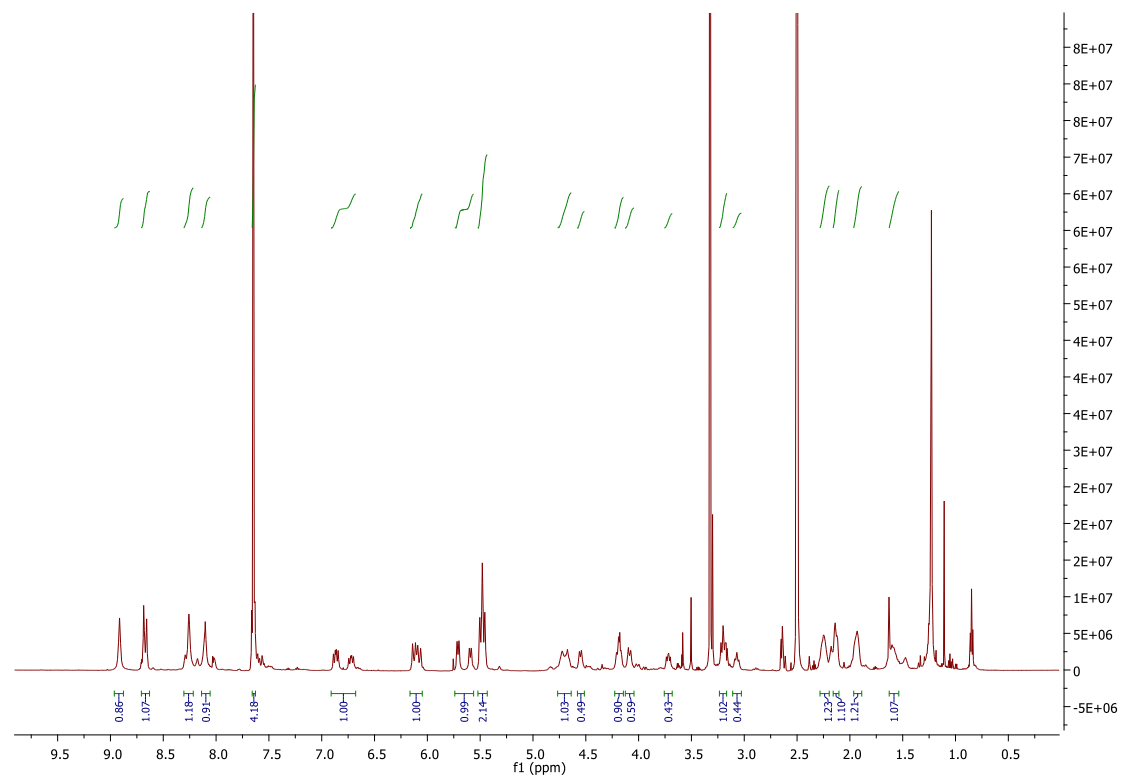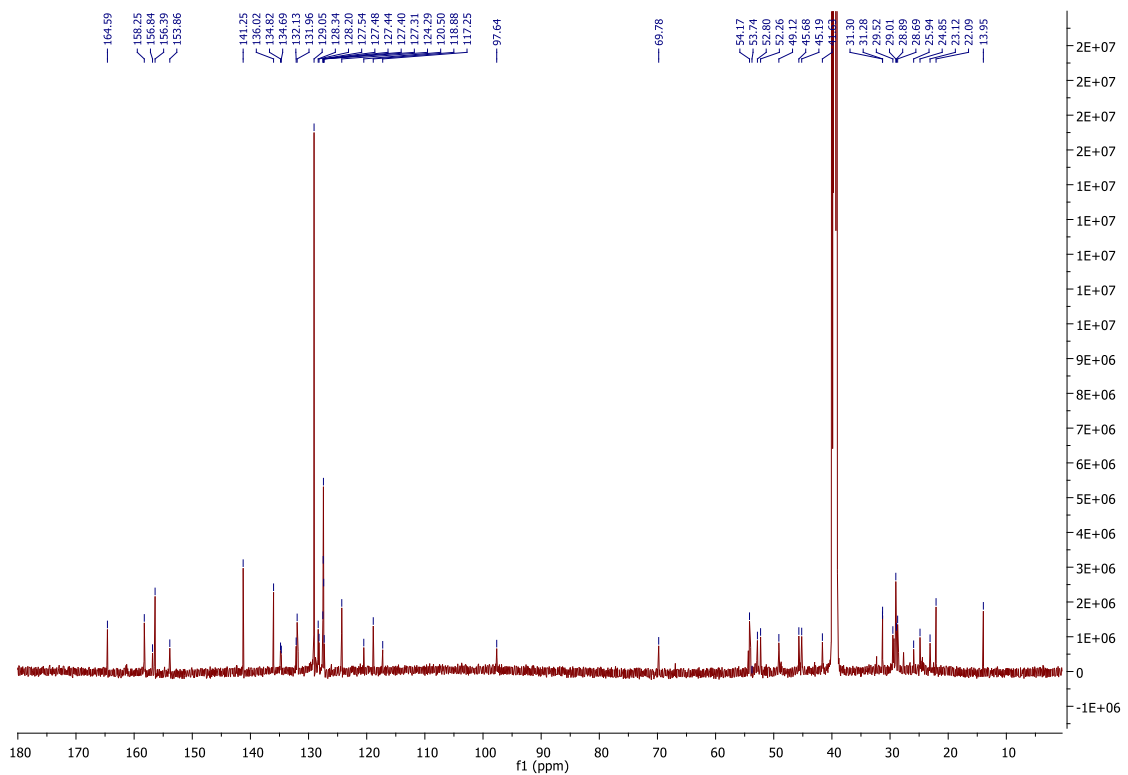

**(R)-1-(3-(4-amino-3-(1-(3-fluoro-4-(hydroxymethyl)phenyl)-1H-1,2,3-triazol-4-yl)-1H-pyrazolo[3,4-d]pyrimidin-1-yl)piperidin-1-yl)prop-2-en-1-one (1c)**



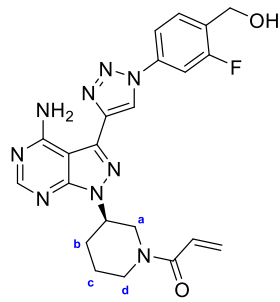

LC-MS chromatogram, detection at 280 nm

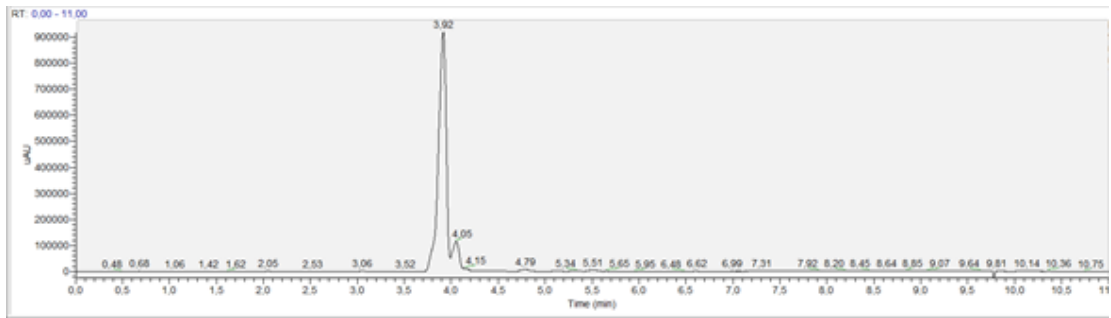

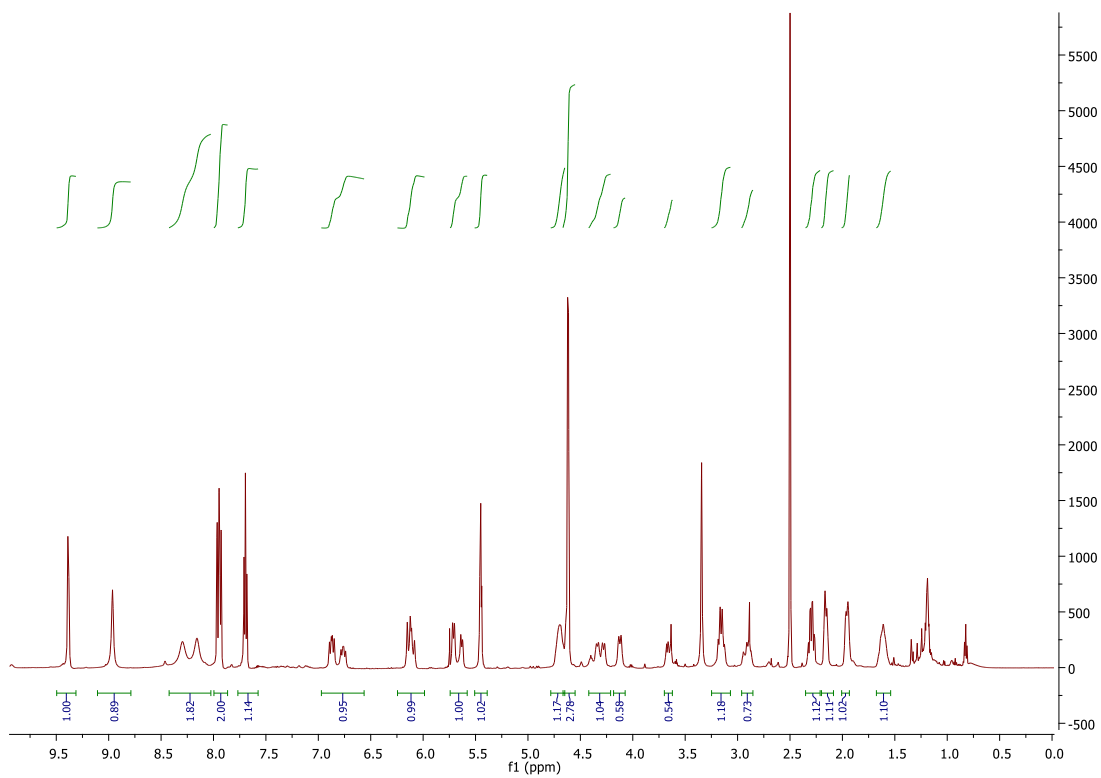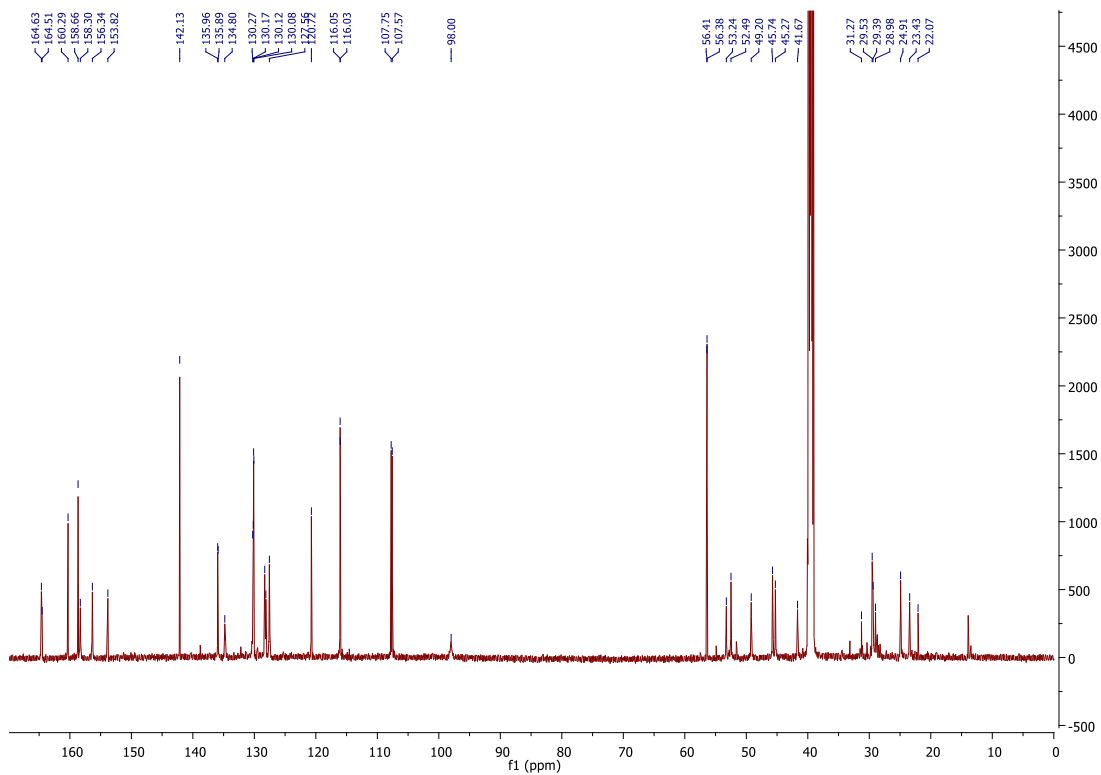

**(R)-1-(3-(4-amino-3-(1-(4-chloro-2-hydroxyphenyl)-1H-1,2,3-triazol-4-yl)-1H-pyrazolo[3,4-d]pyrimidin-1-yl)piperidin-1-yl)prop-2-en-1-one (1d)**

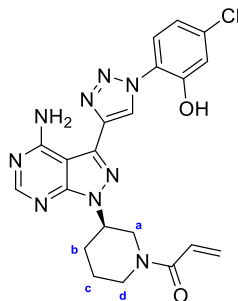

LC-MS chromatogram, detection at 280 nm

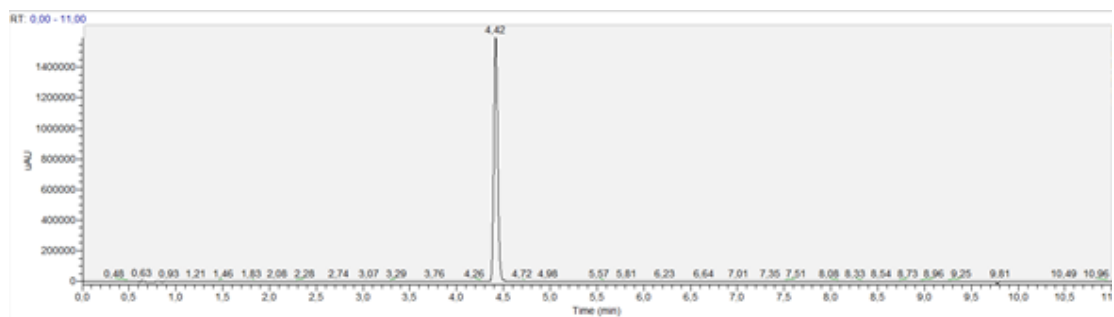

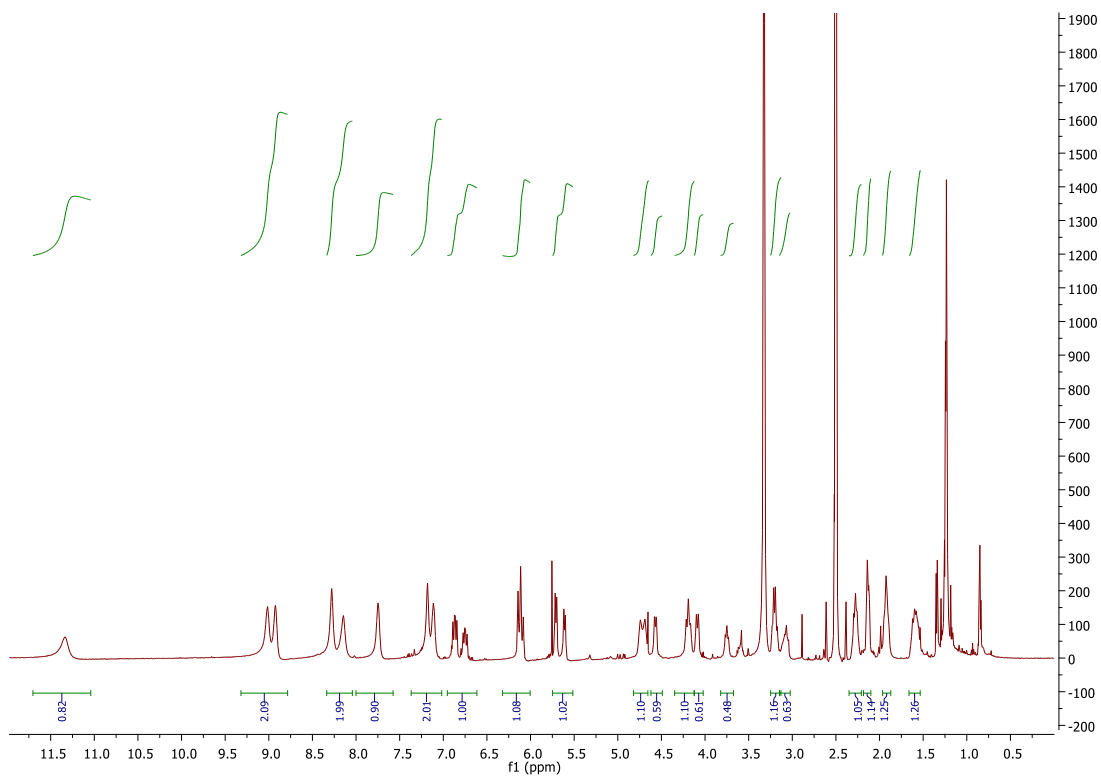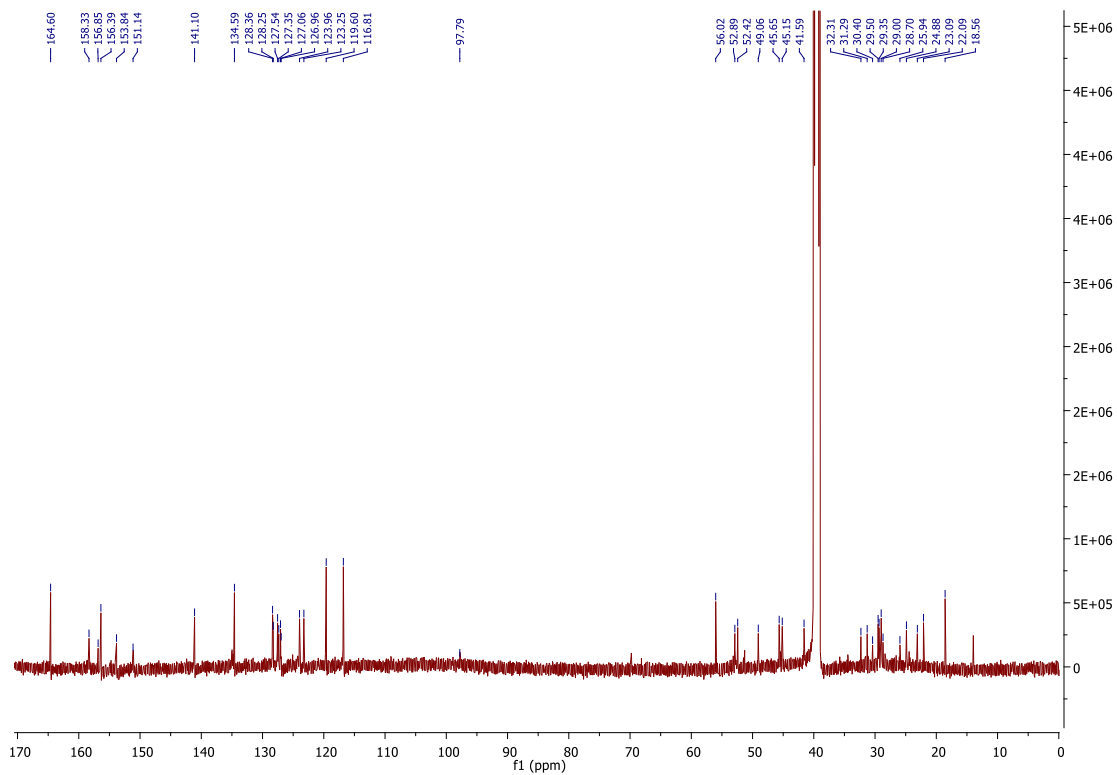

**1-((R)-3-(4-amino-3-(1-((R)-2-(4-bromophenyl)-2-hydroxy-ethyl)-1H-1,2,3-triazol-4-yl)-1H-pyrazolo[3,4-d]pyrimidin-1-yl)piperidin-1-yl)prop-2-en-1-one (1e)**

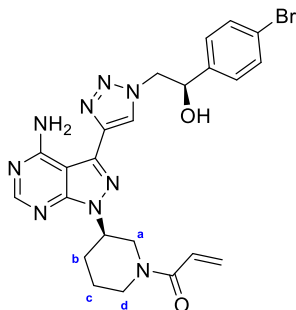

LC-MS chromatogram, detection at 280 nm

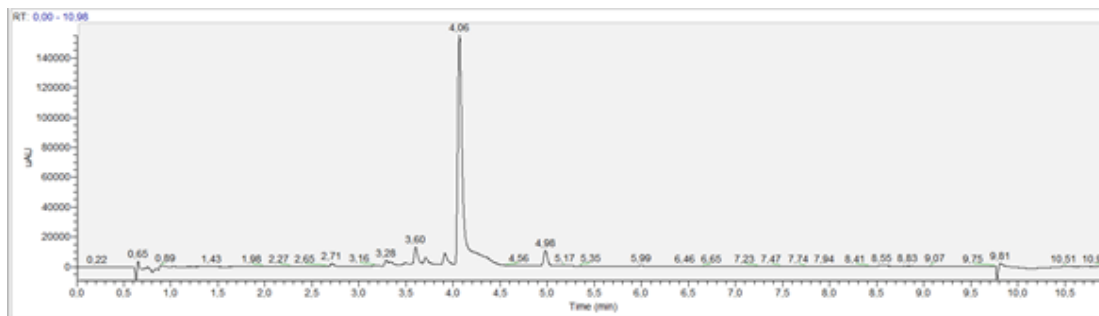

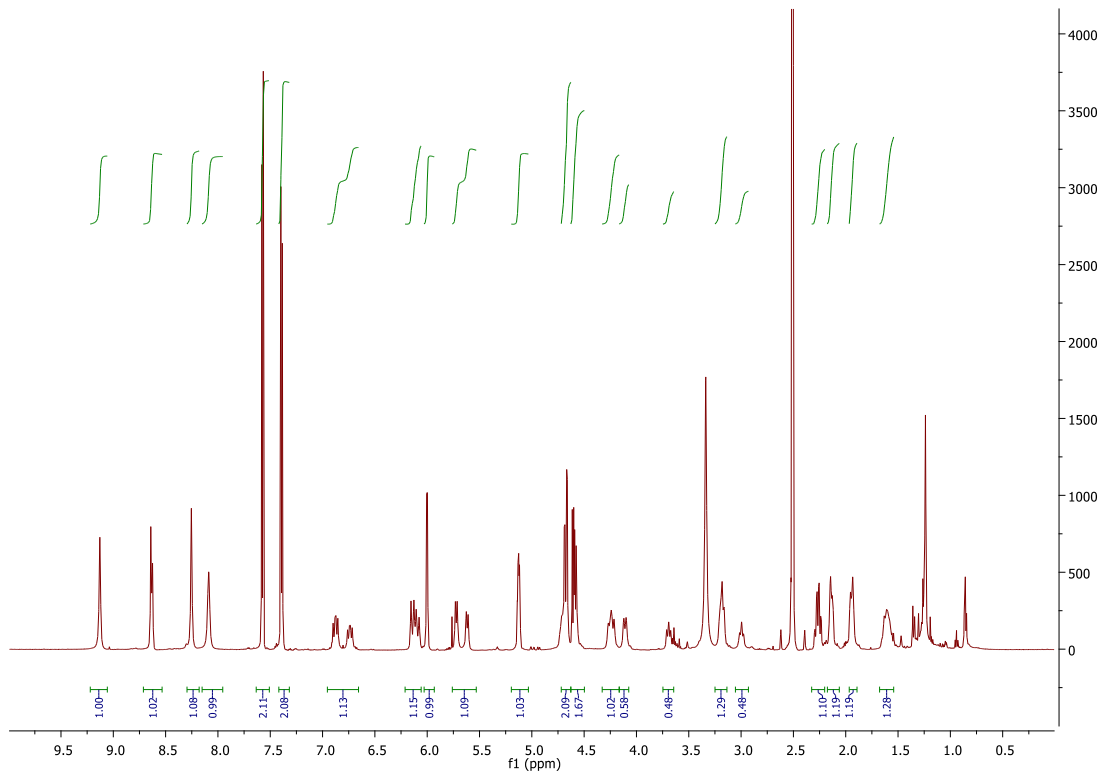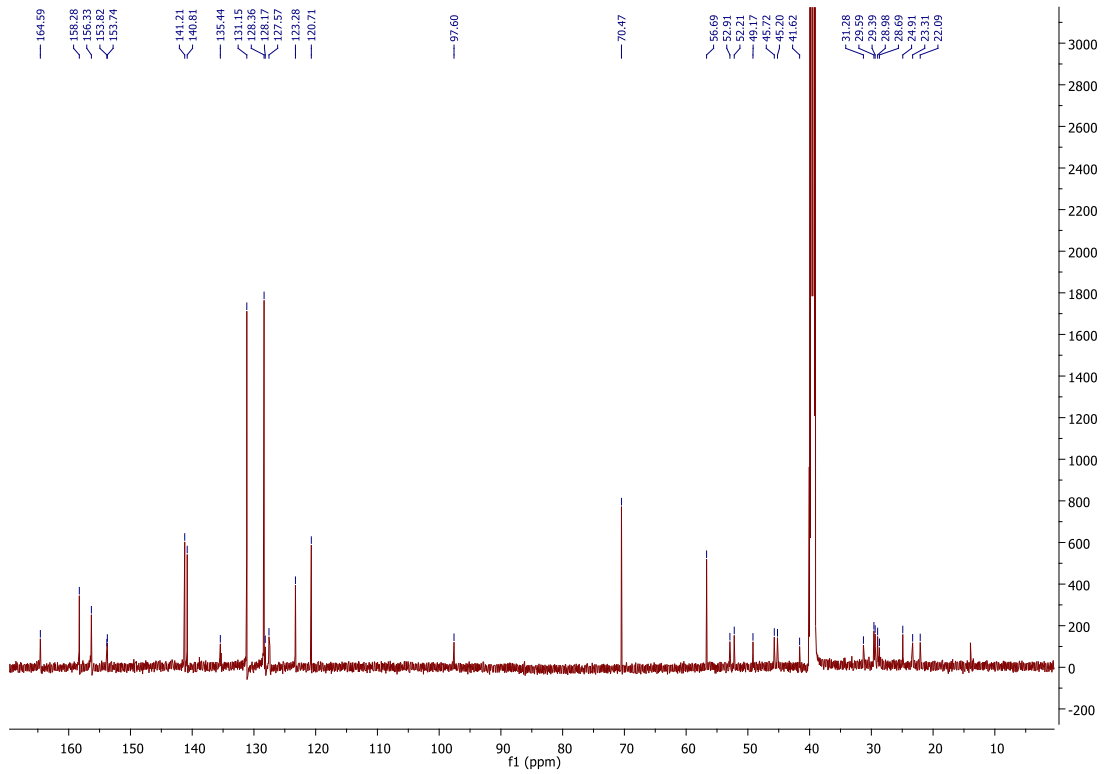

**(R)-1-(3-(4-amino-3-(1-(4-bromophenyl)-1H-1,2,3-triazol-4-yl)-1H-pyrazolo[3,4-d]pyrimidin-1-yl)piperidin-1-yl)prop-2-en-1-one (1f)**

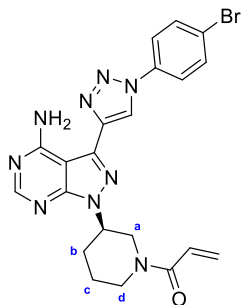

LC-MS chromatogram, detection at 280 nm

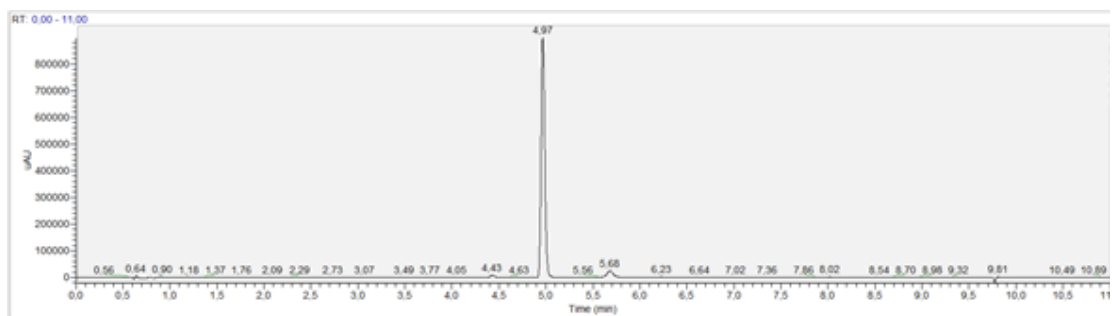

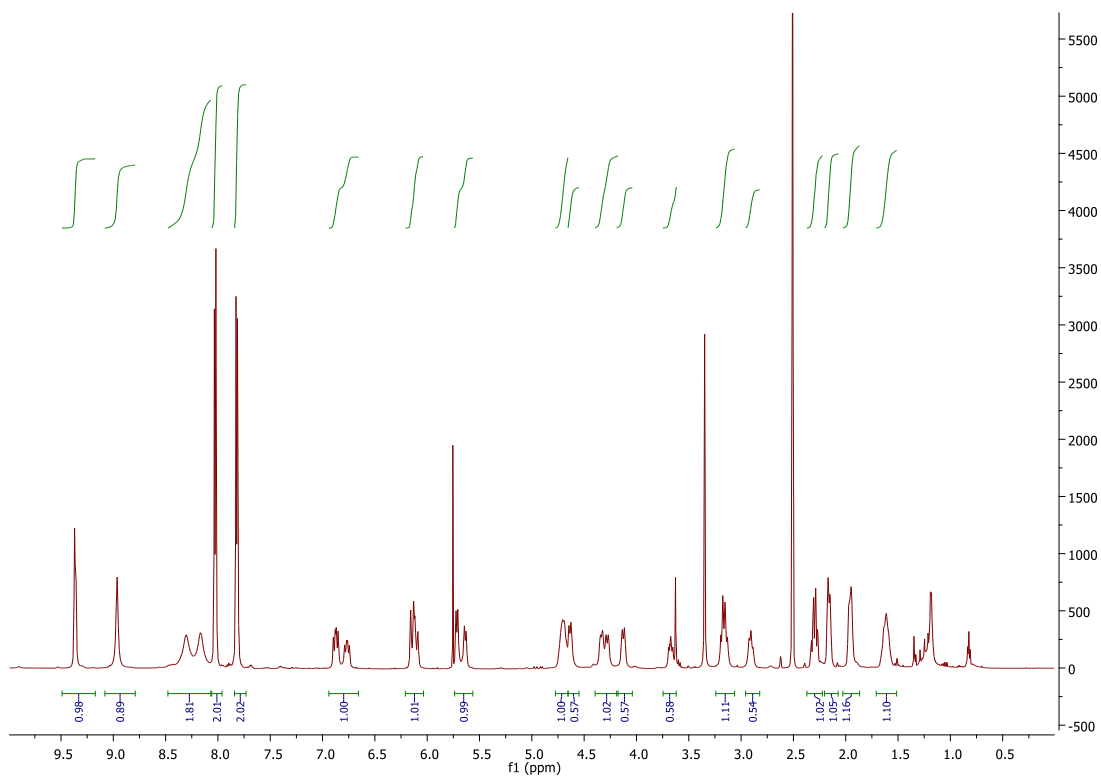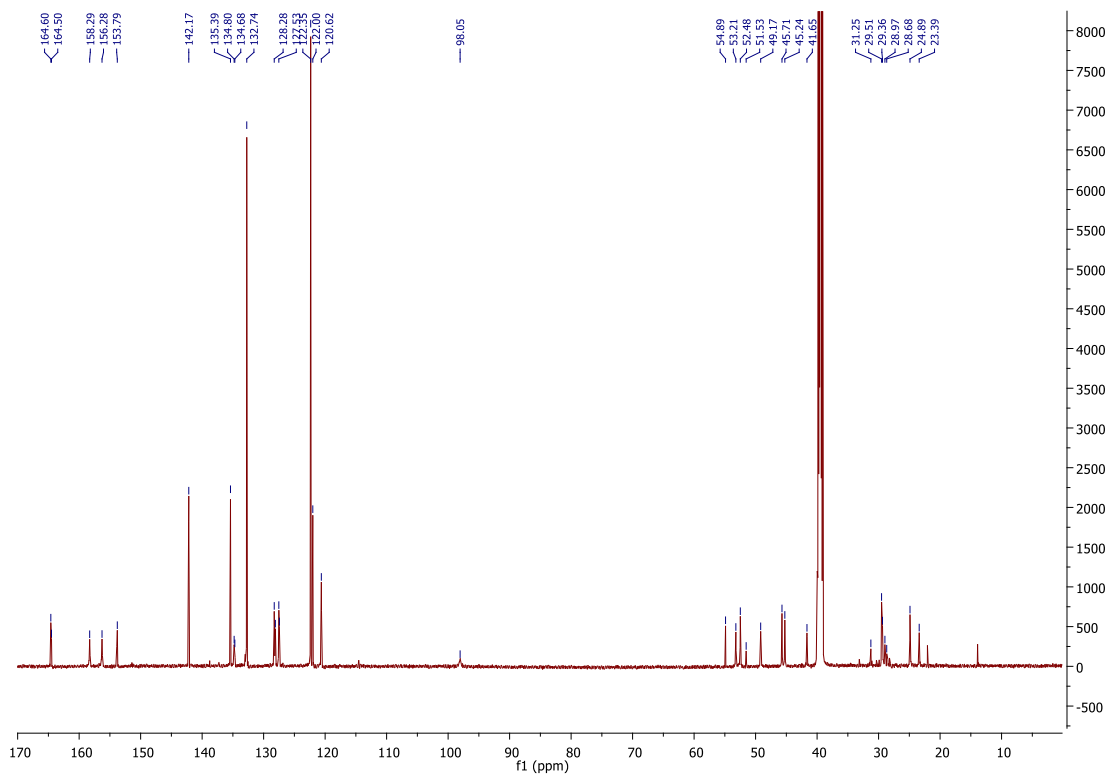



**(R)-1-(3-(4-amino-3-(1-phenethyl-1H-1,2,3-triazol-4-yl)-1H-pyrazolo[3,4-d]pyrimidin-1-yl)piperidin-1-yl)prop-2-en-1-one (1h)**

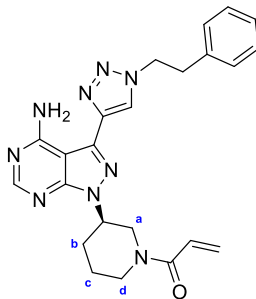

LC-MS chromatogram, detection at 280 nm

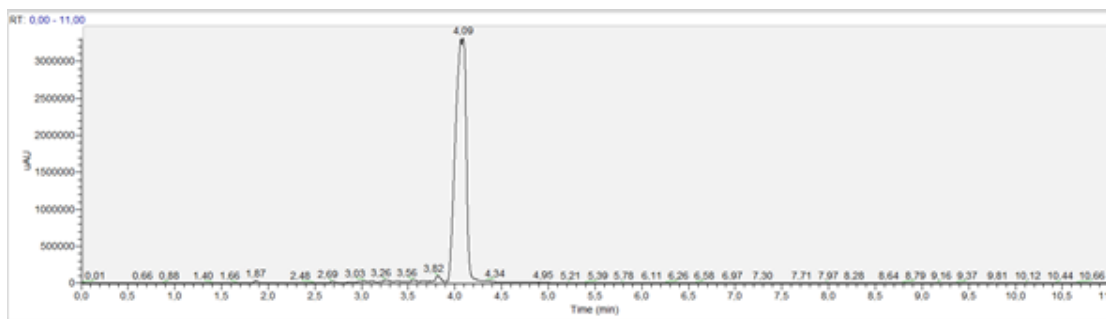

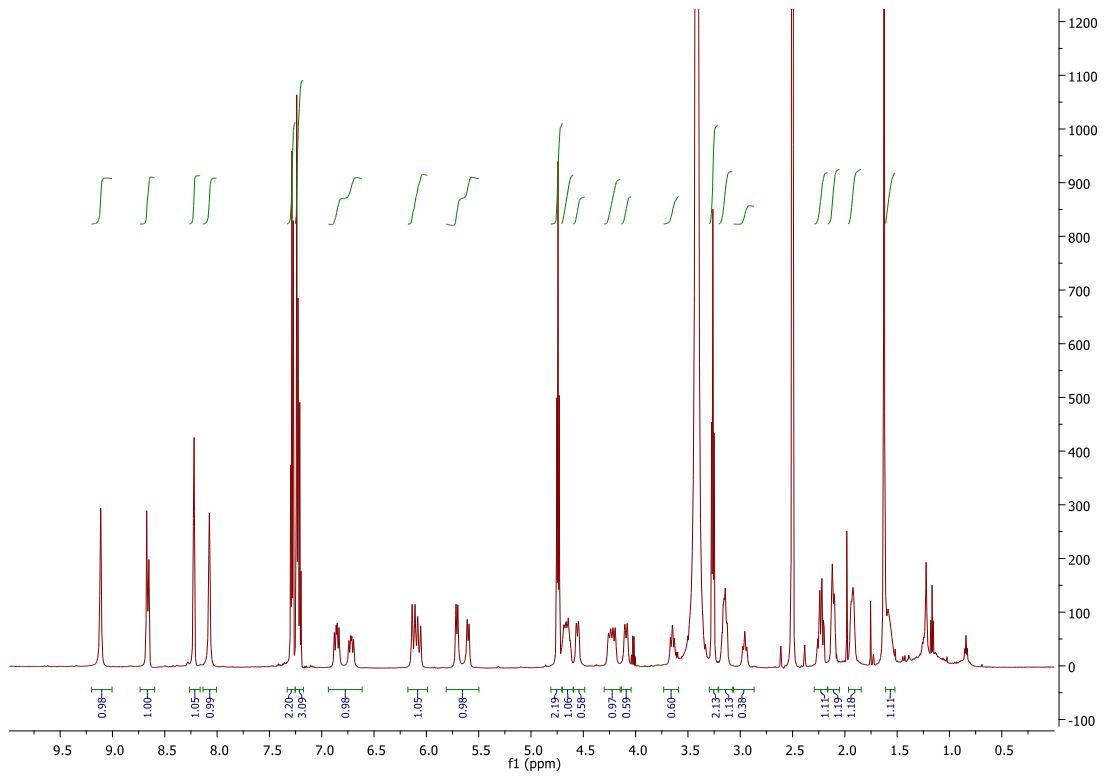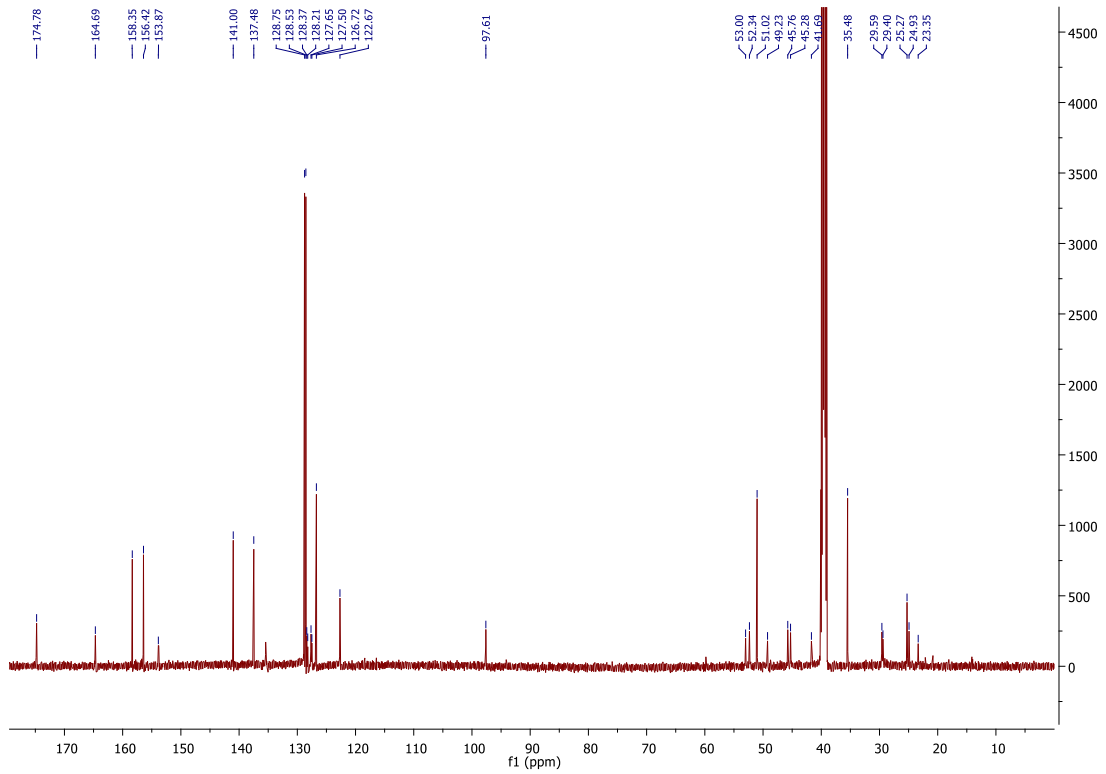

**(R)-1-(3-(4-Amino-3-(1-(4-methoxyphenyl)-1H-1,2,3-triazol-4-yl)-1H-pyrazolo[3,4-d]pyrimidin-1-yl)piperidin-1-yl)prop-2-en-1-one (1i)**

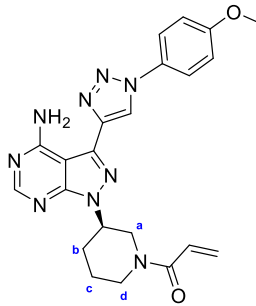

LC-MS chromatogram, detection at 280 nm

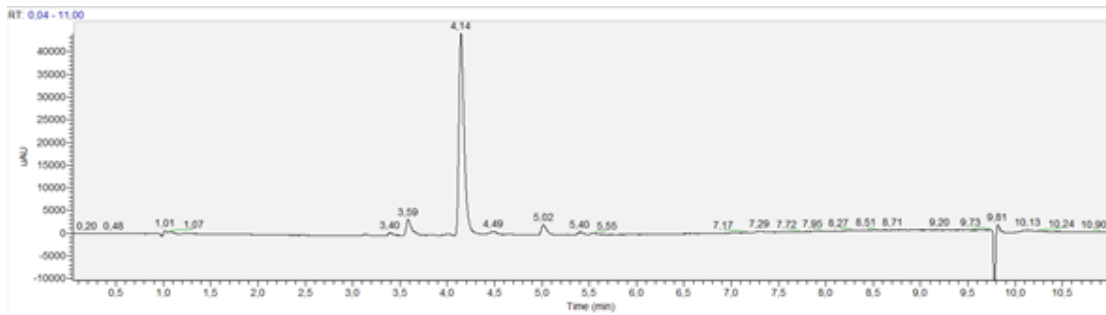

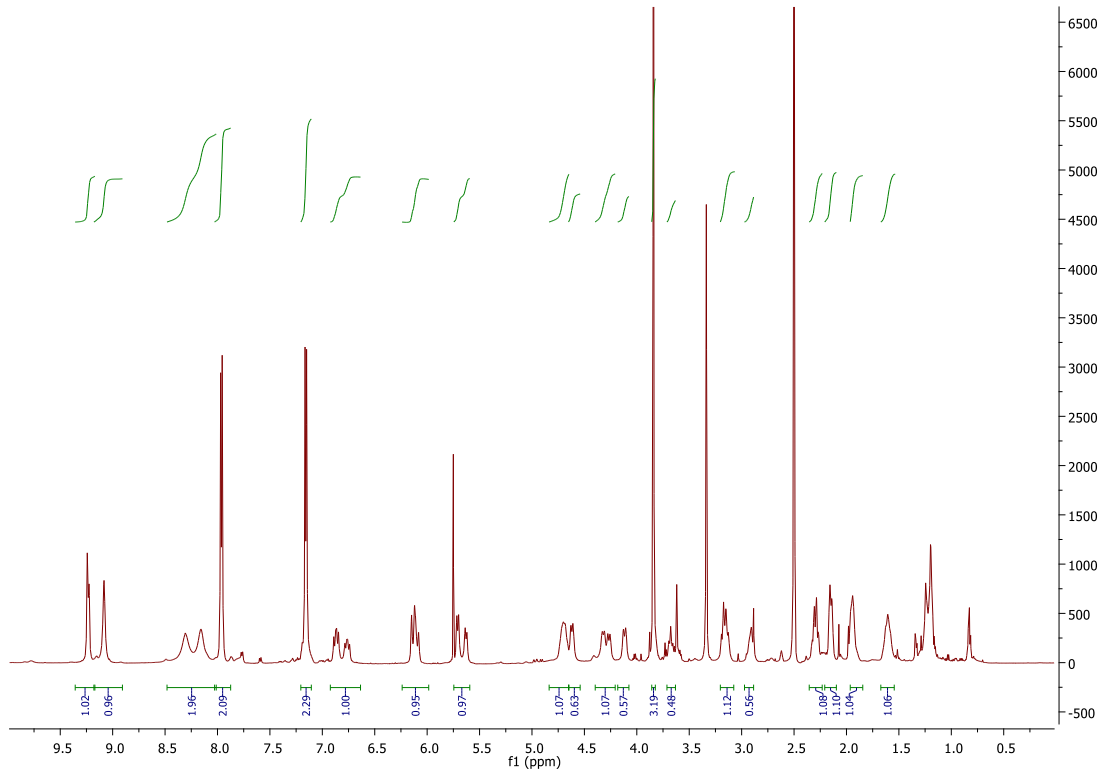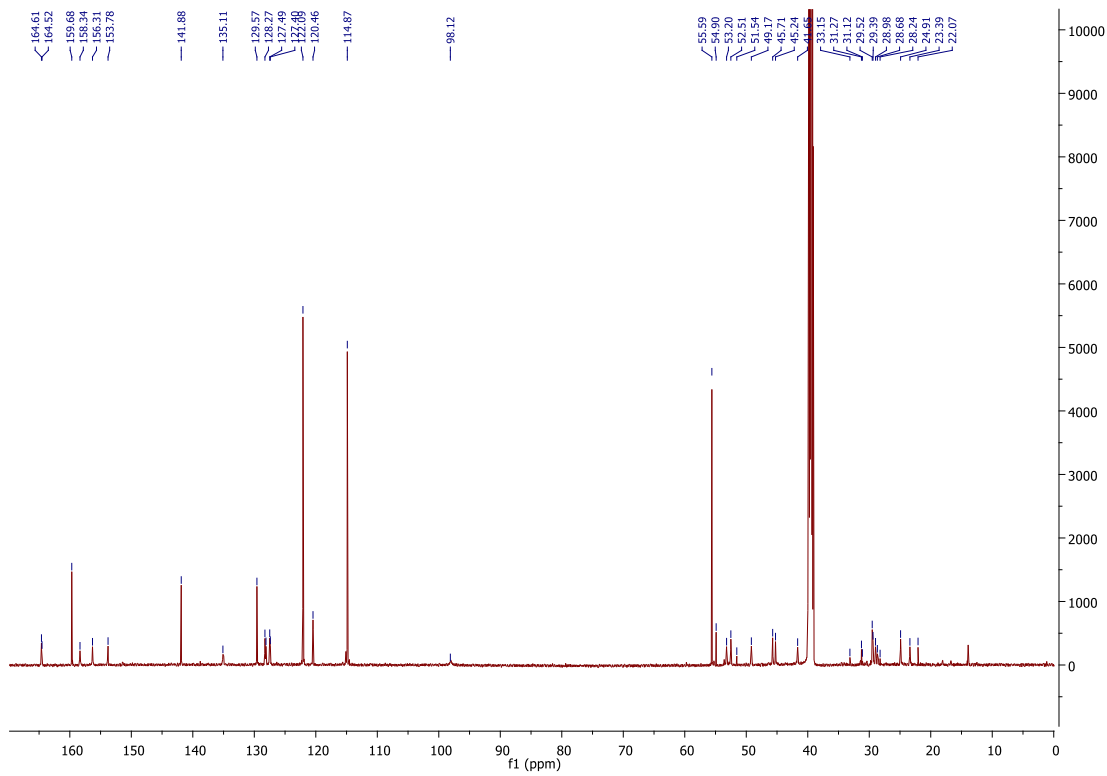

**Methyl (*R*)-4-(4-(1-(1-acryloylpiperidin-3-yl)-4-amino-1*H*-pyrazolo [3,4-*d*]pyrimidin-3-yl)-1*H*-1,2,3-triazol-1-yl)benzoate (1j)**

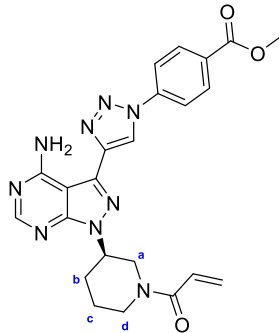

LC-MS chromatogram, detection at 280 nm

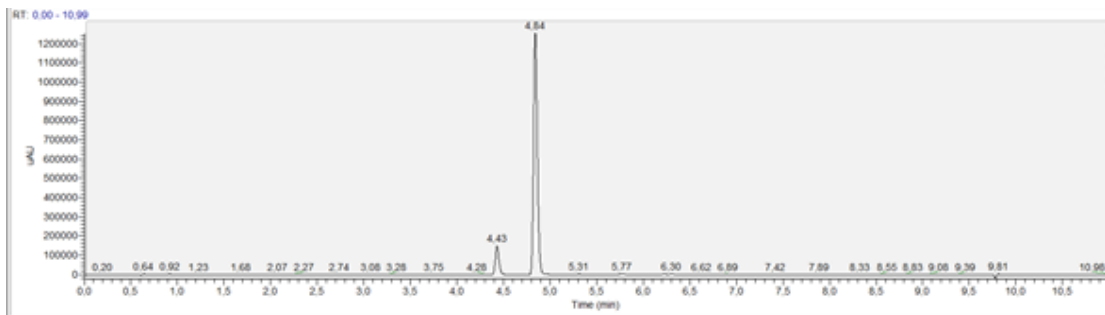

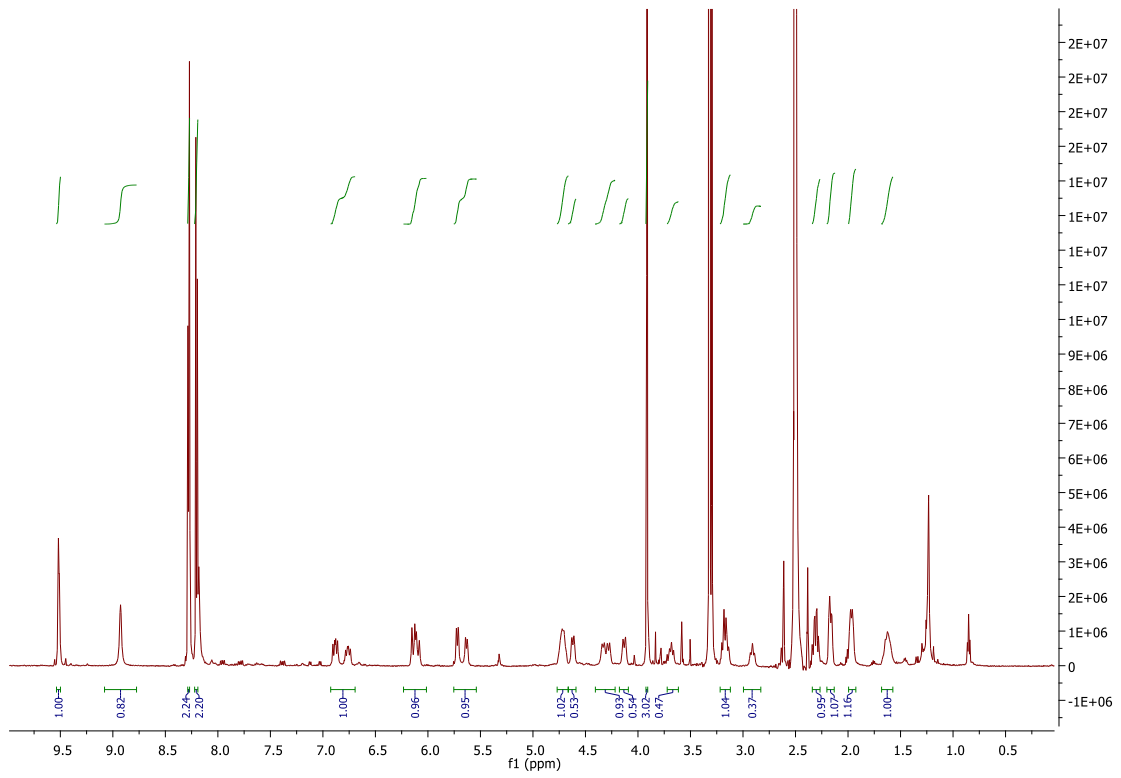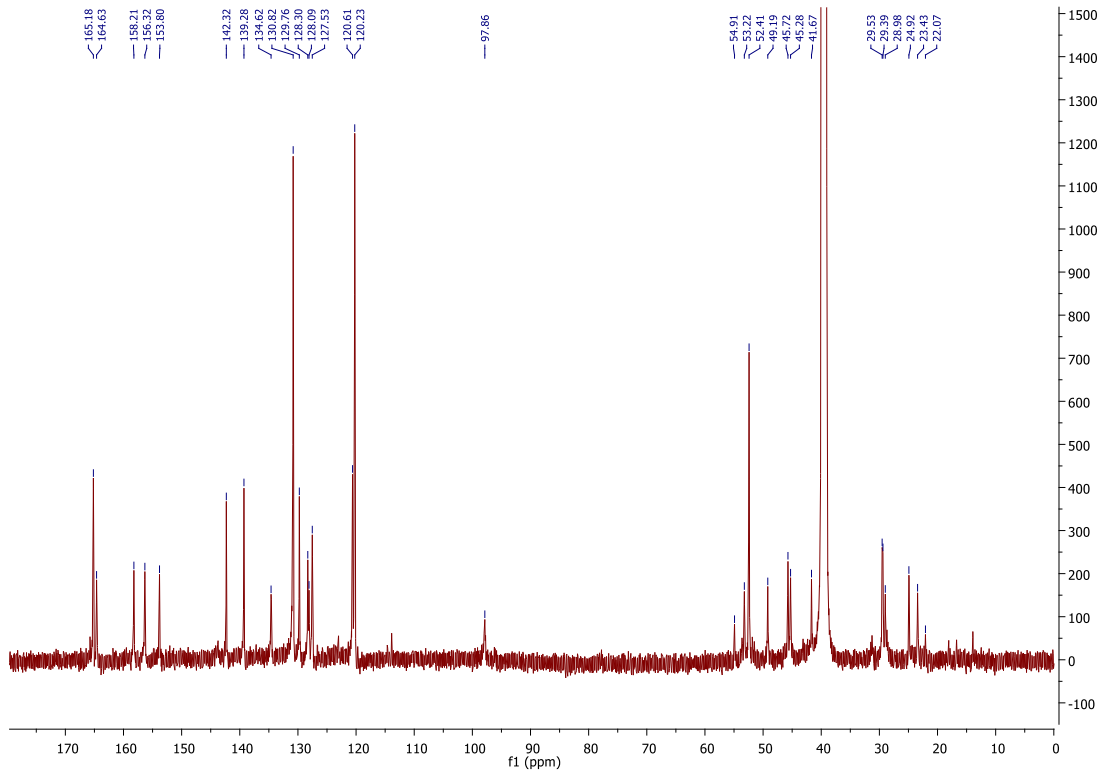

**(R)-1-(3-(4-amino-3-(1-(2,2-difluoro-2-phenylethyl)-1H-1,2,3-triazol-4-yl)-1H-pyrazolo[3,4-d]pyrimidin-1-yl)piperidin-1-yl)prop-2-en-1-one (1k)**

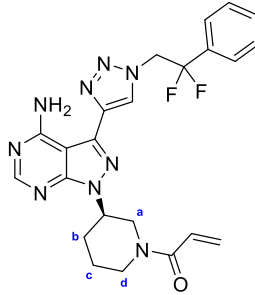

LC-MS chromatogram, detection at 280 nm

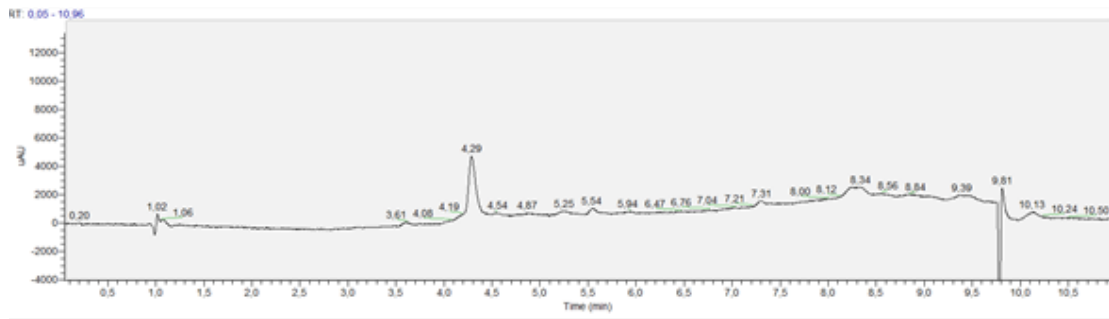

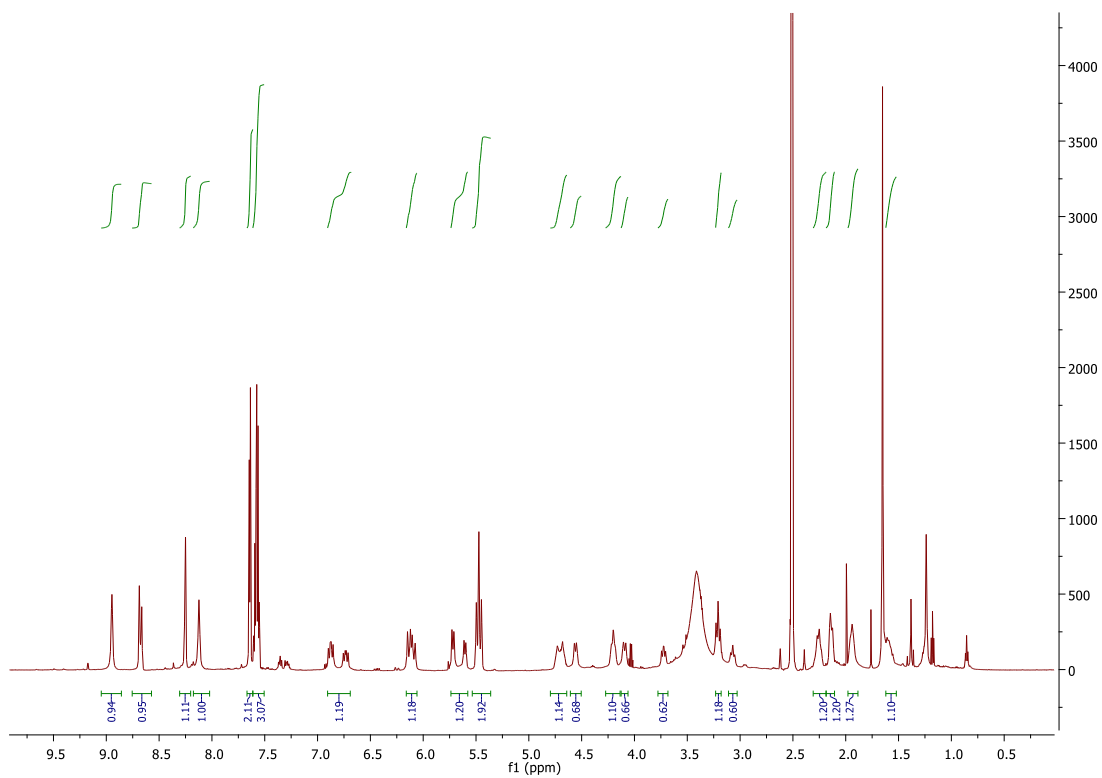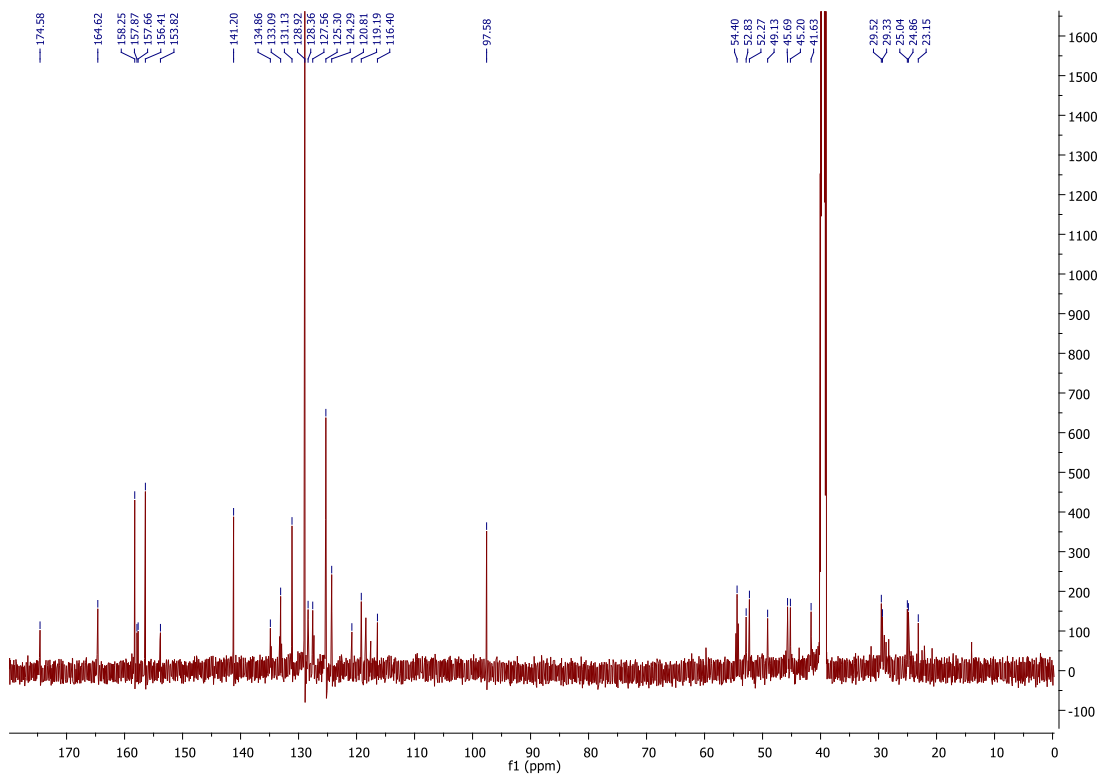



**Synthesis of IB-1-24:**

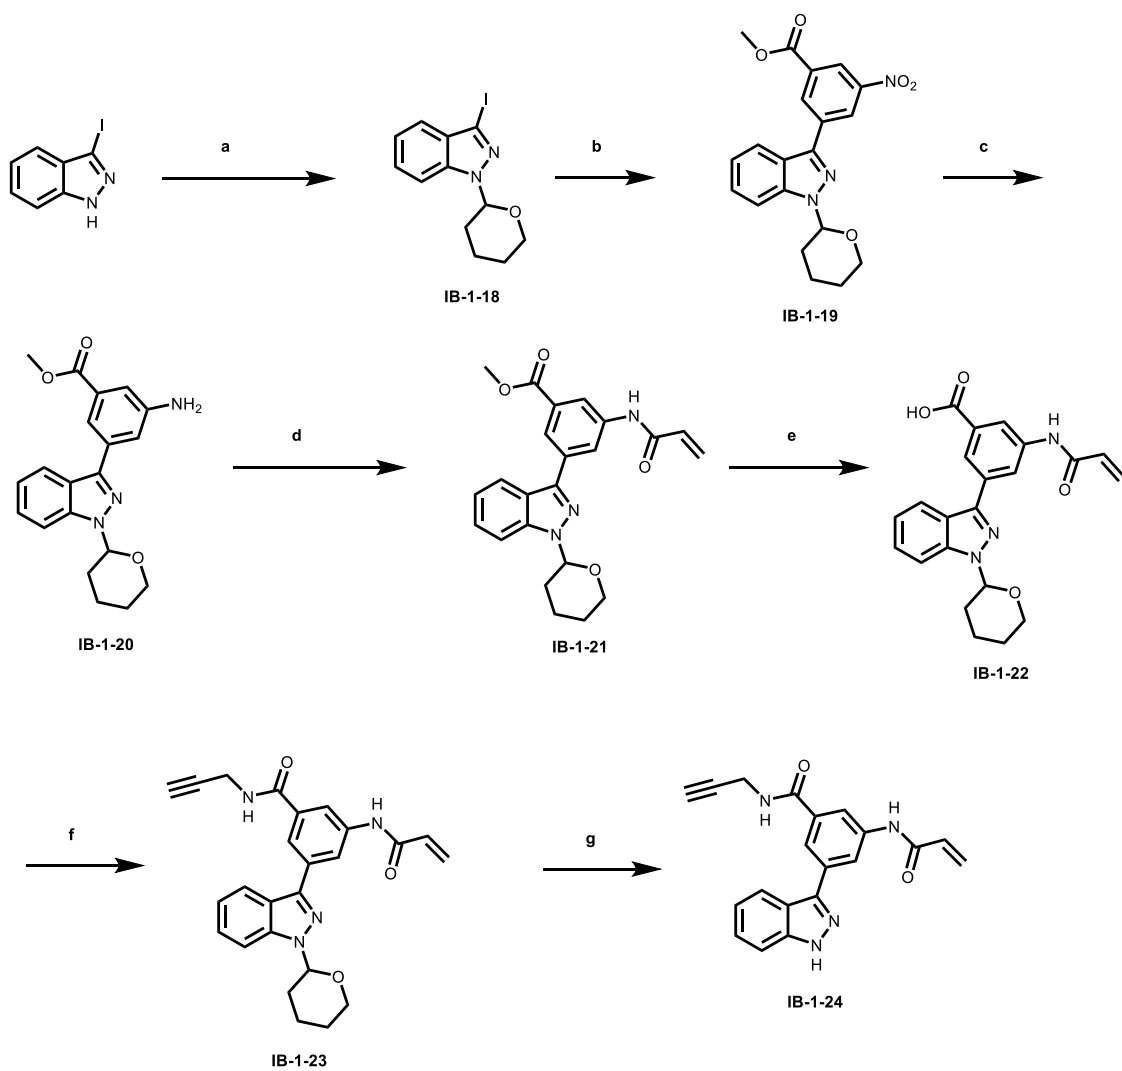

**3-iodo-1-(tetrahydro-2H-pyran-2-yl)-1H-indazole (IB-1-18)**

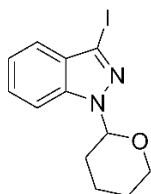

Sample 515 Vial 1:D,4 ID File IB-1-18\_3-25062020\_8 Date 25-Jun-2020 Time 16:25:24

4: UV Detector: TAC :Wavelength Range: (210 - 500) Smooth (Mn, 2x3)

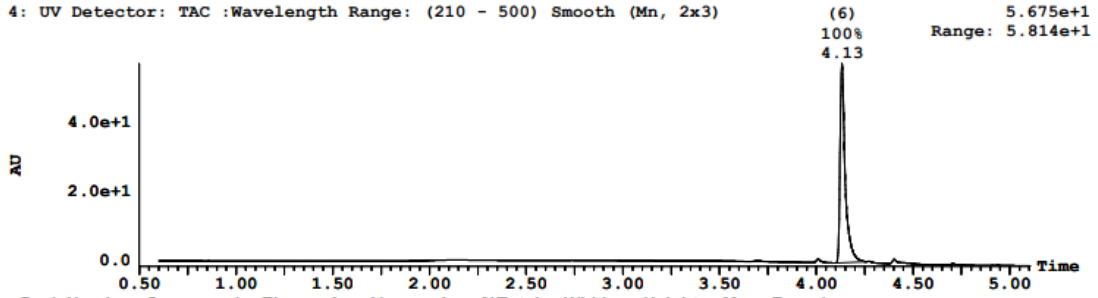

7.776  
7.754  
7.539  
7.537  
7.522  
7.519  
7.516  
7.501  
7.498  
7.469  
7.448  
7.301  
7.282  
7.264  
5.885  
5.879  
5.860  
5.855  
3.902  
3.900  
3.872  
3.773  
3.754  
3.744  
3.739  
3.727  
3.330  
2.520  
2.516  
2.512  
2.507  
2.406  
2.399  
2.383  
2.375  
2.049  
2.005  
1.971  
1.964  
1.610  
1.597  
1.587  
1.578  
1.567

IB-1-18\_3 29.06.2020

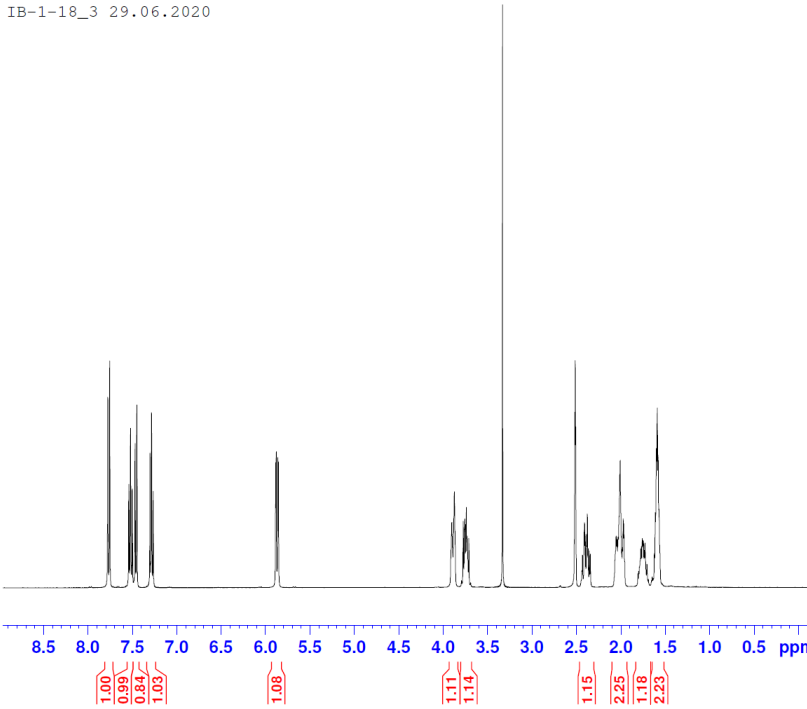

```

Current Data Parameters
NAME          IB-1-18_3
EXPNO         1
PROCNO        1

F2 - Acquisition Parameters
Date_         20200629
Time          12.03
INSTRUM       spect
PROBHD        5 mm PABBO BB/
PULPROG       zg
TD             16384
SOLVENT       DMSO
NS             28
DS             0
SWH            7211.539 Hz
FIDRES         0.440157 Hz
AQ             1.1359574 sec
RG             182.5
DW             69.333 usec
DE             6.50 usec
TE             298.0 K
D1             2.00000000 sec
TDO           1

===== CHANNEL f1 =====
SFO1          400.3545018 MHz
NUC1           1H
P1            13.00 usec
PLW1          18.50000000 W

F2 - Processing parameters
SI             32768
SF            400.3524985 MHz
WDW            EM
SSB            0
LB             0.50 Hz
GB             0
PC             1.00
    
```

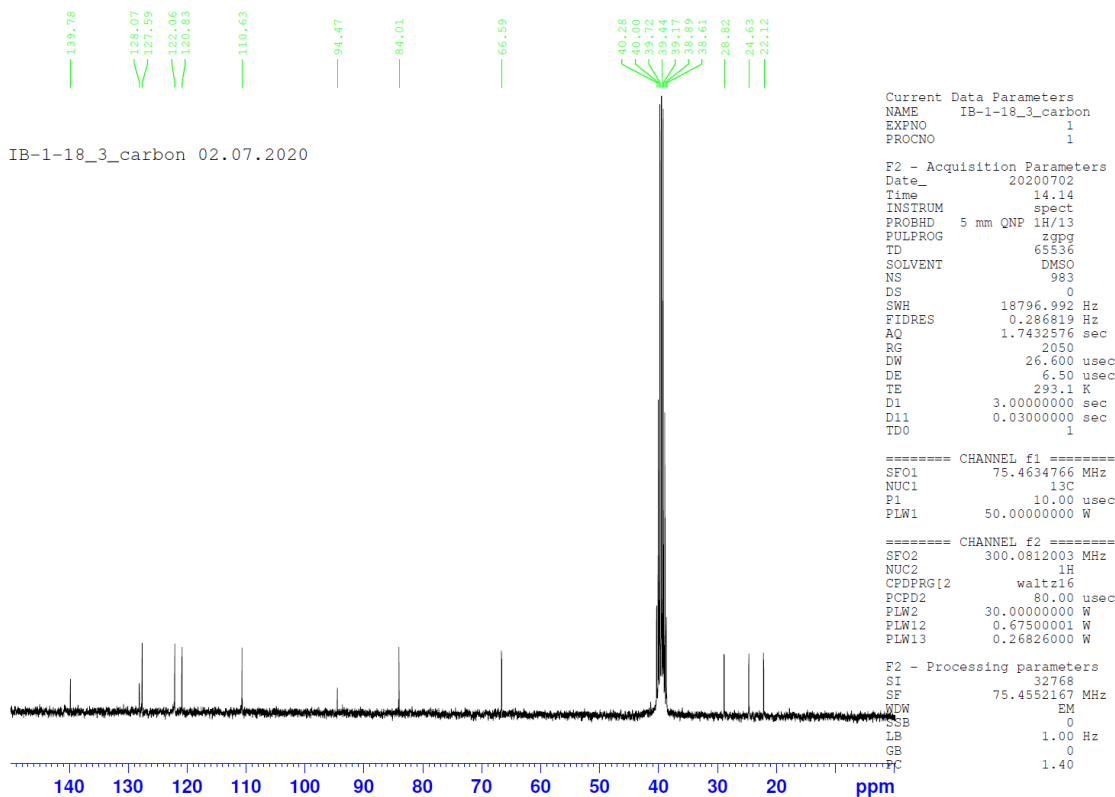

**Methyl 3-nitro-5-(1-(tetrahydro-2H-pyran-2-yl)-1H-indazol-3-yl)benzoate (IB-1-19).**

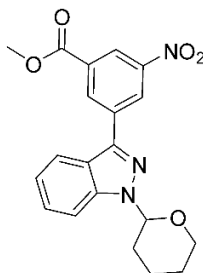

Sample 407 Vial 1:B,2 ID File IB-1-19\_2-31 Date 08-Sep-2019 Time 15:37:39

4: UV Detector: TAC :Wavelength Range: (210 - 500) Smooth (Mn, 2x3)

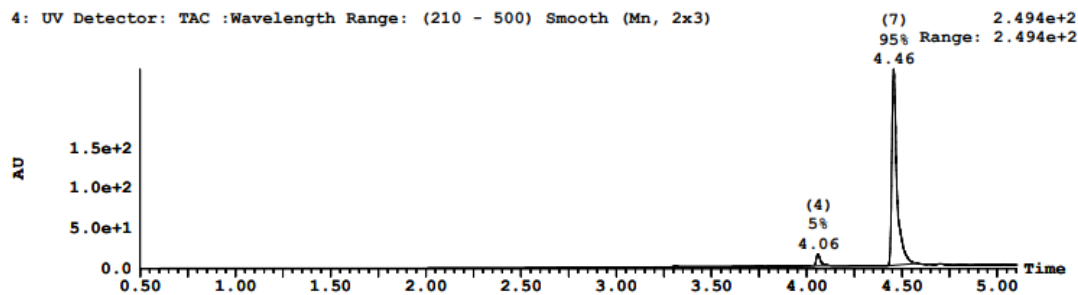

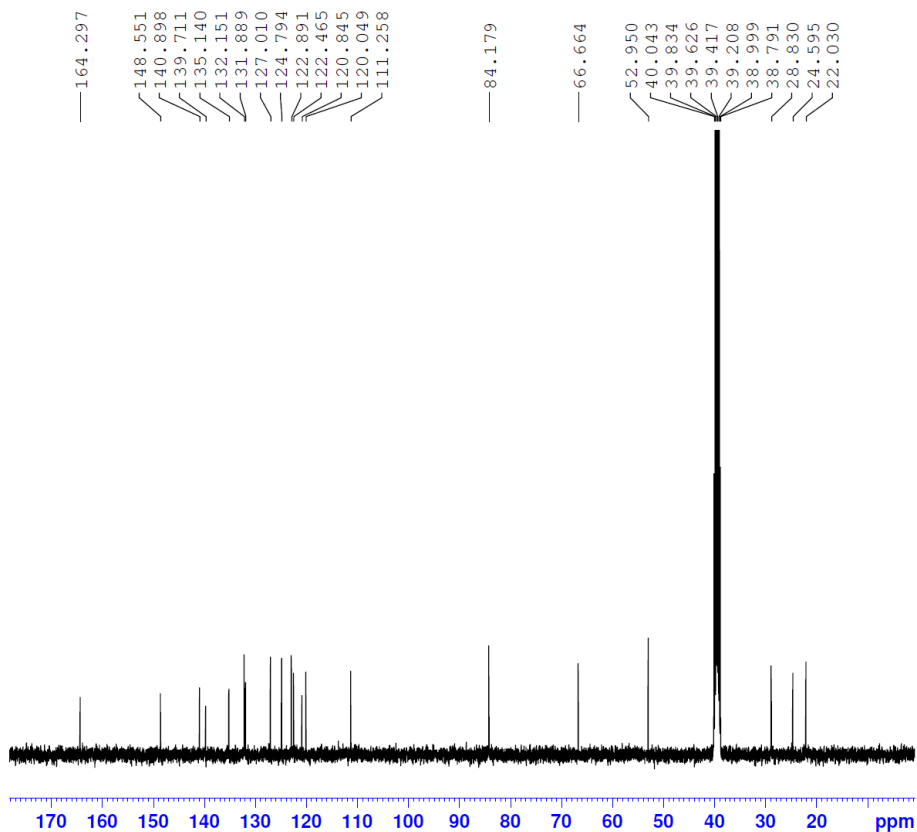

```

Current Data Parameters
NAME      KAS-2-409 LIKE IB-1-19_CARBON
EXPNO    1
PROCNO   1

F2 - Acquisition Parameters
Date_    20200628
Time     12.49
INSTRUM  spect
PROBHD   5 mm PABBO BB/
PULPROG  zgpg
TD        65536
SOLVENT  DMSO
NS        934
DS        0
SWH       25252.535 Hz
FIDRES    0.385323 Hz
AQ        1.2976128 sec
RG        1030
DW        19.800 usec
DE        6.50 usec
TE        298.2 K
D1        3.00000000 sec
D11       0.03000000 sec
TD0       1

----- CHANNEL f1 -----
SFO1     100.6797896 MHz
NUC1     13C
P1       9.00 usec
PLW1     64.00000000 W

----- CHANNEL f2 -----
SFO2     400.3541014 MHz
NUC2     1H
CHPRG[2] waitz16
PCPD2    90.00 usec
PLW2     18.50000000 W
PLW12    0.41110000 W
PLW13    0.33291000 W

F2 - Processing parameters
SI       131072
SF       100.6687754 MHz
WDW      EM
SSB      0
LB       1.00 Hz
GB       0
PC       1.40

```

**Methyl 3-amino-5-(1-(tetrahydro-2H-pyran-2-yl)-1H-indazol-3-yl)benzoate (IB-1-20).**

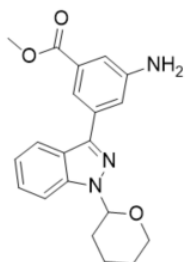

Sample 36 Vial 1:C,4 ID File IB-1-20\_4-8 Date 05-Jul-2020 Time 17:13:52 Description combined f20-27 without f23

4: UV Detector: TAC :Wavelength Range: (210 - 500) Smooth (Mn, 2x3) (1) 1.404e+2  
 100% Range: 1.405e+2  
 3.89

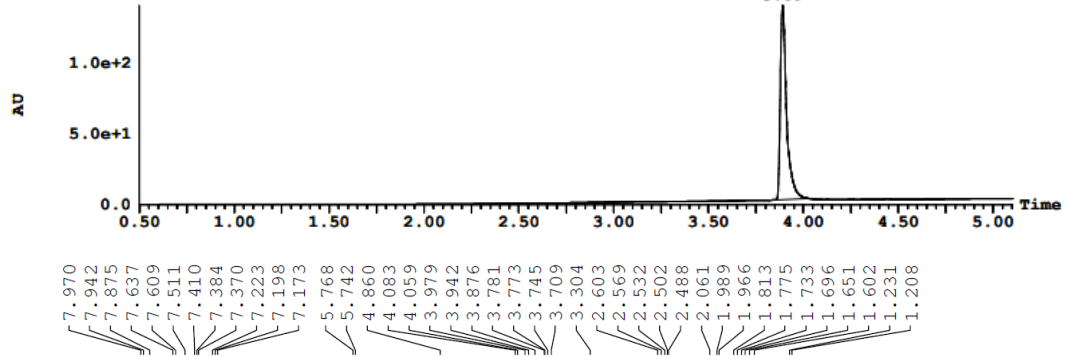

IB-1-20\_4\_H after drying 19.07.2020

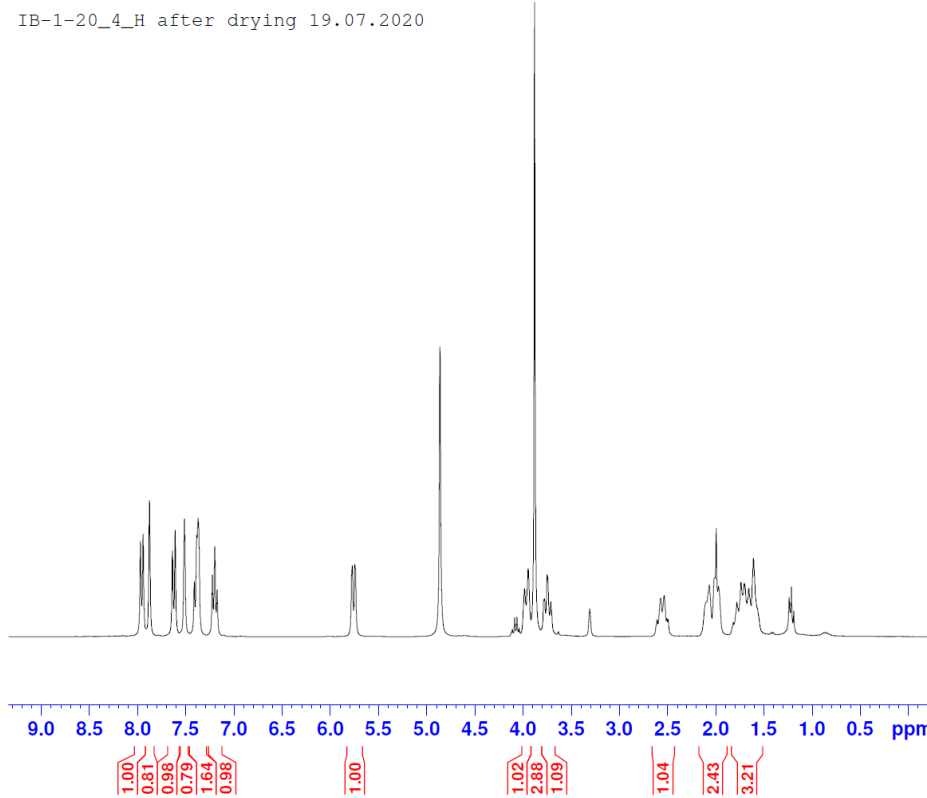

Current Data Parameters  
 NAME IB-1-20\_4\_H after drying  
 EXPNO 1  
 PROCNO 1  
 F2 - Acquisition Parameters  
 Date\_ 20200719  
 Time 12.04  
 INSTRUM spect  
 PROBHD 5 mm QNP 1H/13  
 PULPROG zg  
 TD 16384  
 SOLVENT MeOD  
 NS 32  
 DS 0  
 SWH 6009.615 Hz  
 FIDRES 0.366798 Hz  
 AQ 1.3631488 sec  
 RG 71.8  
 DW 83.200 usec  
 DE 6.50 usec  
 TE 293.4 K  
 D1 2.0000000 sec  
 TD0 1  
 ===== CHANNEL f1 =====  
 SF01 300.0812603 MHz  
 NUC1 1H  
 P1 12.00 usec  
 PLW1 30.0000000 W  
 F2 - Processing parameters  
 SI 32768  
 SF 300.0800074 MHz  
 WDW EM  
 SSB 0  
 LB 0.30 Hz  
 GB 0  
 PC 1.00

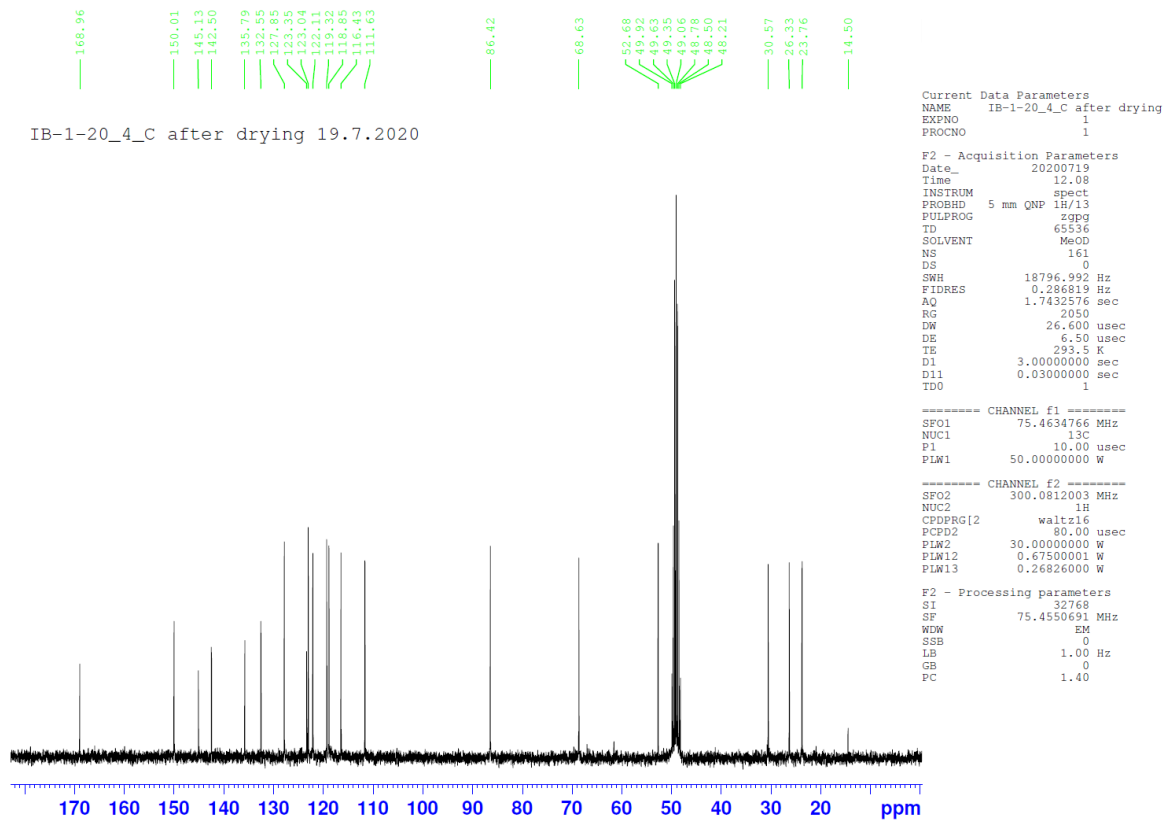

**Methyl 3-acrylamido-5-(1-(tetrahydro-2H-pyran-2-yl)-1H-indazol-3-yl)benzoate (IB-1-21).**

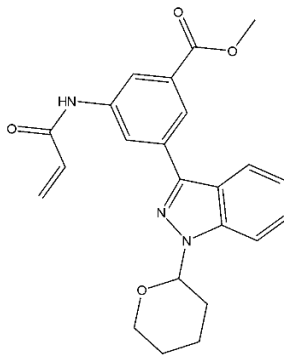

Sample 54 Vial 1:E,3 ID File IB-1-21\_4-12 Date 12-Jul-2020 Time 16:58:00

4: UV Detector: TAC :Wavelength Range: (210 - 500) Smooth (Mn, 2x3)

(6)  
100%  
4.02  
2.44e+2  
Range: 2.444e+2

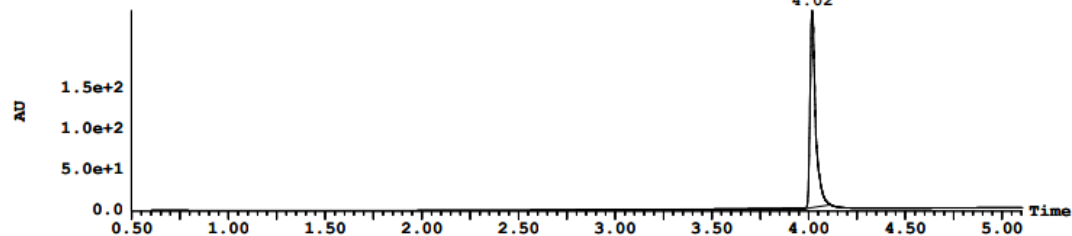

8.550  
8.393  
8.188  
8.052  
8.031  
7.609  
7.587  
7.411  
7.393  
7.374  
7.260  
7.232  
7.213  
7.195  
6.457  
6.455  
6.415  
6.413  
6.308  
6.282  
6.266  
6.240  
5.771  
5.765  
5.748  
5.741  
5.728  
5.700  
4.074  
4.049  
4.044  
3.903  
3.764  
3.758  
2.158  
2.100  
2.093  
2.067  
1.786  
1.759  
1.736  
1.662  
1.655  
1.254

IB-1-21\_4 sec combi f16\_H 21.07.2020

```
Current Data Parameters
NAME      IB-1-21_4 sec combi f16_H
EXPNO     1
PROCNO    1

F2 - Acquisition Parameters
Date_     20200721
Time      14.32
INSTRUM   spect
PROBHD    5 mm PABBO BB/
PULPROG   zg
TD         16384
SOLVENT   CDCl3
NS         34
DS         0
SWH        7211.539 Hz
FIDRES     0.440157 Hz
AQ         1.1359574 sec
RG         42.14
DW         69.333 usec
DE         6.50 usec
TE         298.1 K
D1         2.0000000 sec
TD0        1

===== CHANNEL f1 =====
SF01      400.3545018 MHz
NUC1       1H
P1         13.00 usec
PLW1       18.5000000 W

F2 - Processing parameters
SI         32768
SF         400.3525097 MHz
WDW        EM
SSB        0
LB         0.50 Hz
GB         0
PC         1.00
```

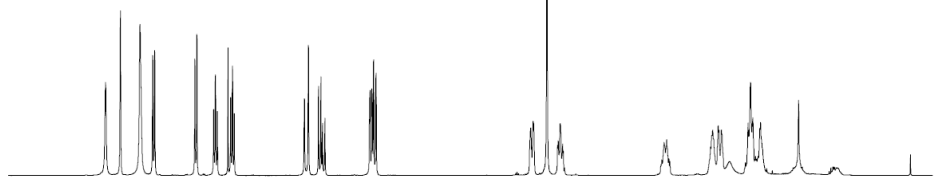

9.0 8.5 8.0 7.5 7.0 6.5 6.0 5.5 5.0 4.5 4.0 3.5 3.0 2.5 2.0 1.5 1.0 ppm

1.00  
0.91  
2.06  
1.12  
1.06  
1.09  
1.08  
1.12  
1.08  
2.25  
1.15  
3.24  
1.17  
1.14  
2.51  
2.39

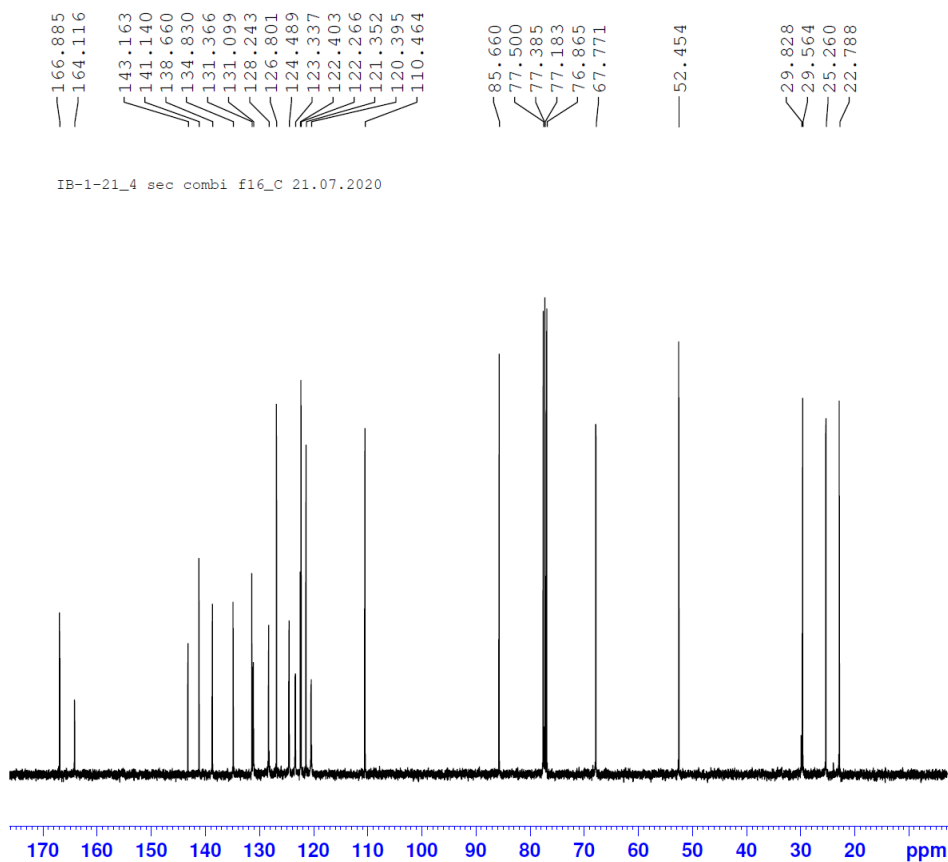

3-acrylamido-5-(1-(tetrahydro-2H-pyran-2-yl)-1H-indazol-3-yl)benzoic acid (IB-1-22).

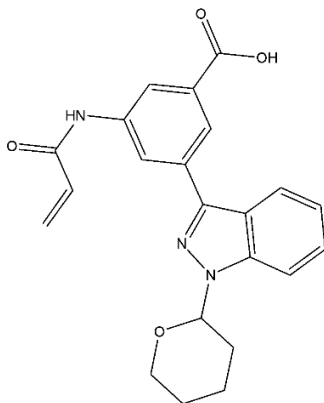



Sample 137 Vial 1:F,8 ID File IB-1-22\_5-40 Date 05-Aug-2020 Time 15:46:17 Description after sec combi f20,22,23,24. after heating

4: UV Detector: TAC :Wavelength Range: (210 - 500) Smooth (Mn, 2x3) (4) 4.358e+1  
 100% Range: 4.363e+1  
 3.69

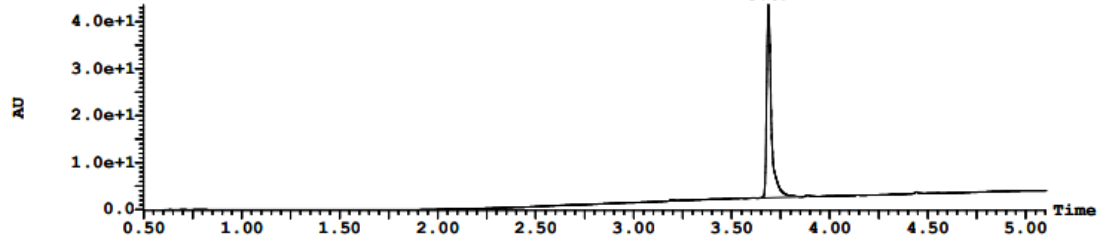

10.412  
 8.587  
 8.244  
 8.214  
 8.090  
 8.069  
 7.831  
 7.810  
 7.517  
 7.498  
 7.479  
 7.349  
 7.330  
 7.311  
 6.501  
 6.484  
 6.459  
 6.343  
 6.338  
 6.300  
 6.296  
 5.964  
 5.958  
 5.939  
 5.935  
 5.811  
 5.807  
 5.786  
 5.781  
 3.915  
 3.782  
 3.327  
 2.540  
 2.510  
 2.506  
 2.501  
 2.497  
 2.068  
 2.033  
 2.027  
 1.625  
 1.258  
 1.234  
 0.853

IB-1-22\_5\_H 19.08.20

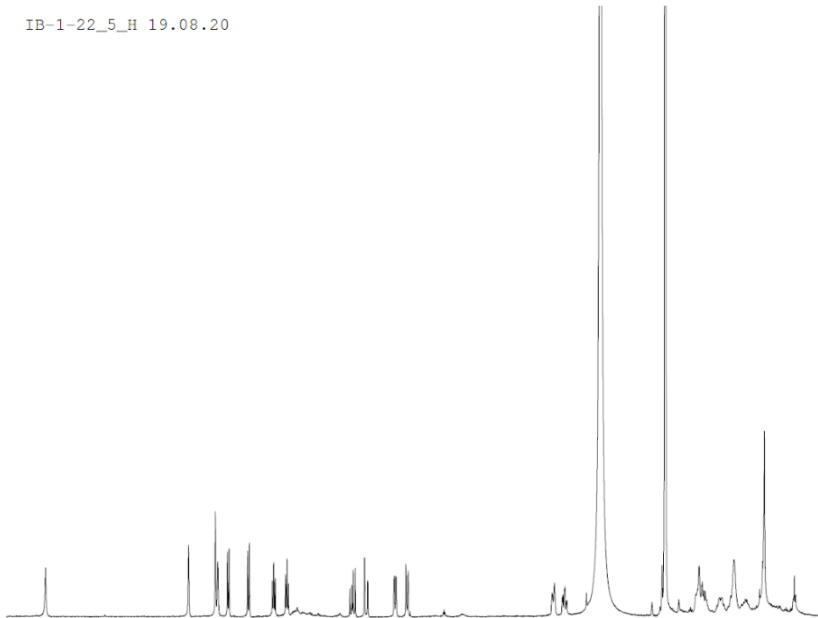

Current Data Parameters  
 NAME IB-1-22\_5\_H\_1iat  
 EXPNO 1  
 PROCNO 1

F2 - Acquisition Parameters  
 Date\_ 20200819  
 Time 12.18  
 INSTRUM spect  
 PROBHD 5 mm PABBO BB/  
 PULPROG zg  
 TD 16384  
 SOLVENT DMSO  
 NS 18  
 DS 0  
 SWH 7211.539 Hz  
 FIDRES 0.440157 Hz  
 AQ 1.1359574 sec  
 RG 224.18  
 DW 69.333 usec  
 DE 6.50 usec  
 TE 298.0 K  
 D1 10.00000000 sec  
 TD0 1

===== CHANNEL f1 =====  
 SF01 400.3545018 MHz  
 NUC1 1H  
 P1 13.00 usec  
 PLW1 18.50000000 W

F2 - Processing parameters  
 SI 32768  
 SF 400.3525031 MHz  
 WDW EM  
 SSB 0  
 LB 0.50 Hz  
 GB 0  
 PC 1.00

0.88  
 0.92  
 1.88  
 0.96  
 0.94  
 1.02  
 1.00  
 0.89  
 0.90  
 0.93  
 0.92  
 1.10  
 1.10  
 3.77  
 1.63  
 3.01

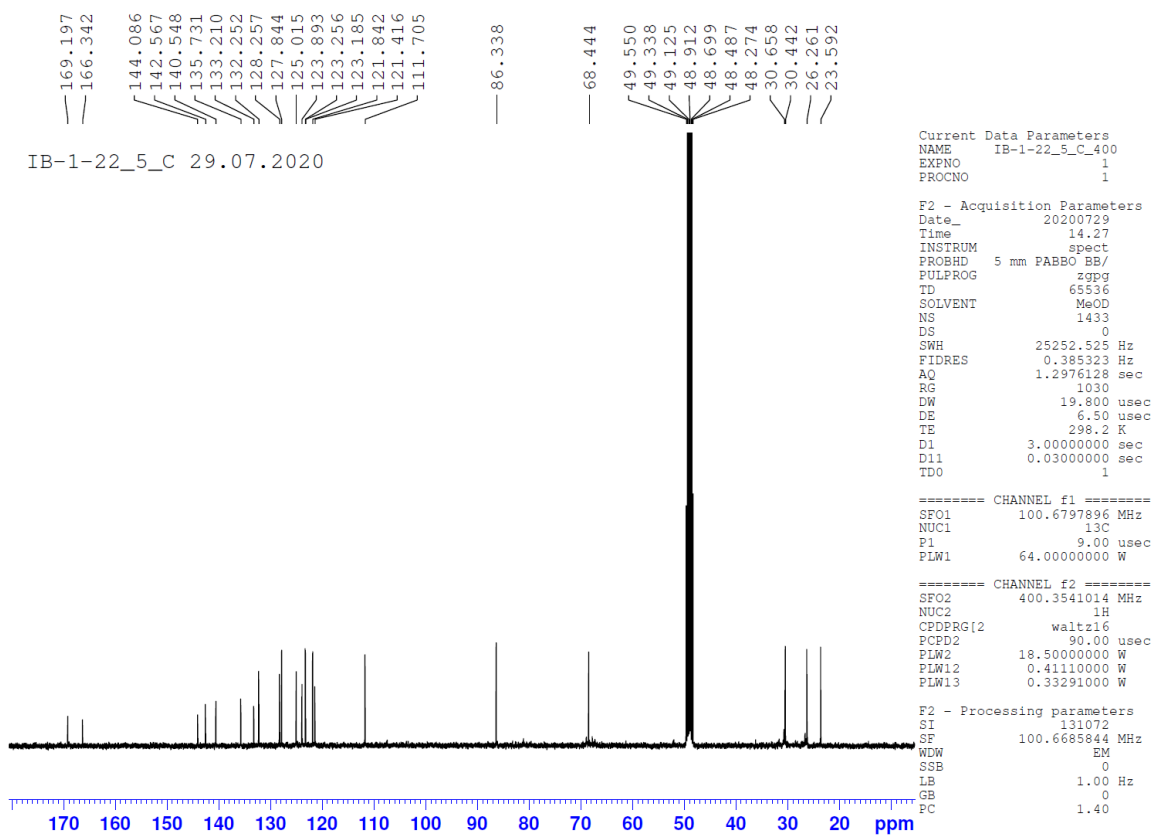

**3-acrylamido-N-(prop-2-yn-1-yl)-5-(1-(tetrahydro-2H-pyran-2-yl)-1H-indazol-3-yl)benzamide (IB-1-23).**

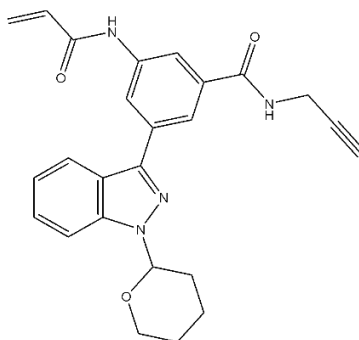

Sample 174 Vial 1:E,2 ID File IB-1-23\_4-20 Date 10-Aug-2020 Time 16:07:05 Description after sec f22-23

4: UV Detector: TAC :Wavelength Range: (210 - 500) Smooth (Mn, 2x3) (2) 1.643e+1  
Range: 1.673e+1

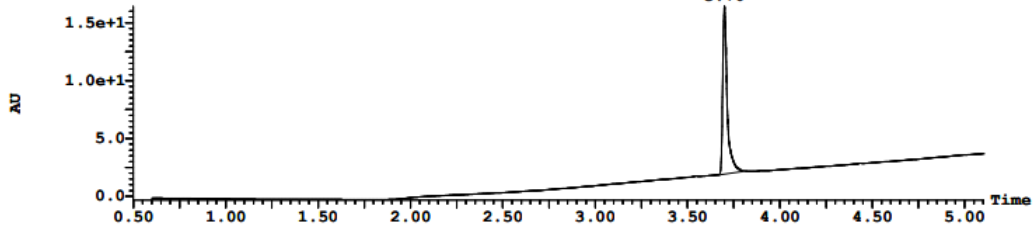

10.491  
9.160  
9.143  
9.126  
8.558  
8.191  
8.165  
8.137  
8.093  
7.844  
7.816  
7.531  
7.507  
7.480  
7.362  
7.337  
7.312  
6.468  
6.435  
6.352  
6.300  
5.963  
5.934  
5.836  
5.799  
4.087  
4.077  
3.914  
3.783  
3.496  
3.328  
3.141  
2.491  
2.055  
2.013  
1.615  
1.245  
1.218

IB-1-23\_4 after HPLC\_H DMSO 18.08.2020 19.8mg

```

Current Data Parameters
NAME      IB-1-23_4 after HPLC_H DMSO
EXPNO    1
PROCNO   1

F2 - Acquisition Parameters
Date_    20200818
Time     16:07
INSTRUM  spect
PROBHD   5 mm QNP 1H/13
PULPROG  zgpg30
TD       16384
SOLVENT  DMSO
NS       30
DS       0
SWH      6009.615 Hz
FIDRES   0.366798 Hz
AQ       1.3631488 sec
RG       362
DM       83.200 usec
DE       6.50 usec
TE       293.2 K
D1       2.00000000 sec
TDO      1

===== CHANNEL f1 =====
SFO1     300.0812603 MHz
NUC1     13C
P1       12.00 usec
PLW1     30.00000000 W

F2 - Processing parameters
SI       32768
SF       300.0800000 MHz
WDW      EM
SSB      0
GB       0.30 Hz
PC       4.00
    
```

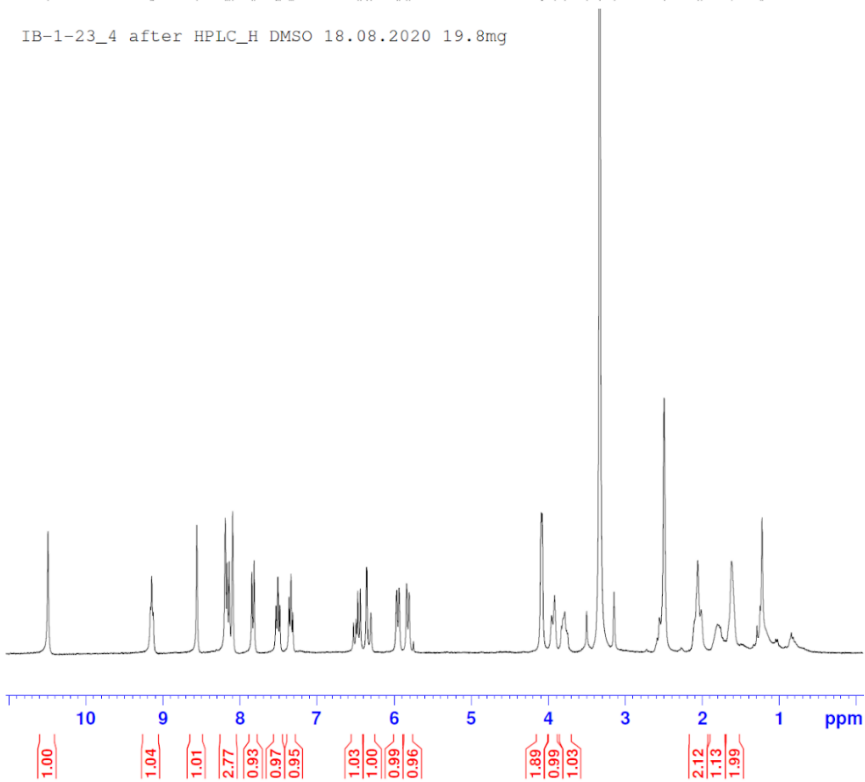

IB-1-23\_4 after HPLC\_C DMSO 18.08.2020 19.8mg

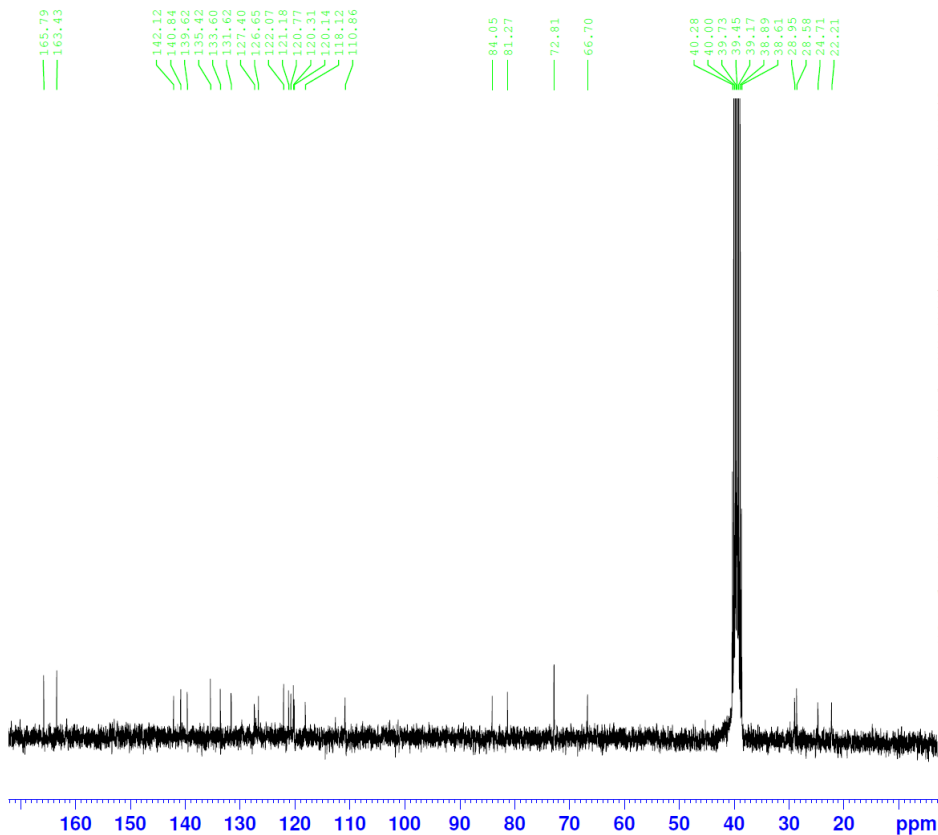

```
Current Data Parameters
NAME      IB-1-23_4 after HPLC_C DMSO
EXPNO    1
PROCNO   1

F2 - Acquisition Parameters
Date_    20200818
Time     10.12
INSTRUM spect
PROBHD   5 mm QNP 1H/13
PULPROG zgpg
TD        65536
SOLVENT  DMSO
NS        456
DS        0
SWH       18796.992 Hz
FIDRES    0.2286819 Hz
AQ        1.7432576 sec
RG        2050
DW        26.600 usec
DE        6.50 usec
TE        293.5 K
D1        3.0000000 sec
D11       0.0300000 sec
TD0       1

===== CHANNEL f1 =====
SFO1      75.4634766 MHz
NUC1      13C
P1        10.00 usec
PLW1      50.0000000 W

===== CHANNEL f2 =====
SFO2      300.0812003 MHz
NUC2      1H
CPDPRG2  waltz16
PCPD2     80.00 usec
PLW2      30.0000000 W
PLW12     0.67500001 W
PLW13     0.26826000 W

F2 - Processing parameters
SI        32768
SF        75.4552167 MHz
WDW       EM
SSB       0
LB        1.00 Hz
GB        0
PC        1.40
```

3-acrylamido-5-(1H-indazol-3-yl)-N-(prop-2-yn-1-yl)benzamide (IB-1-24).

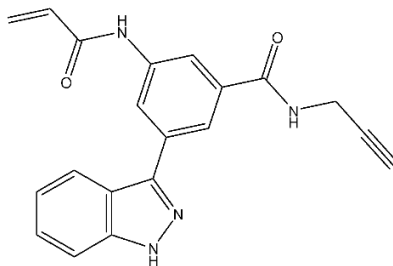

Sample 218 Vial 1:E,6 ID File IB-1-24\_3-7 Date 17-Aug-2020 Time 17:04:14 Description after combi f11

4: UV Detector: TAC :Wavelength Range: (210 - 500) Smooth (Mn, 2x3)

1.04e+1  
Range: 1.068e+1

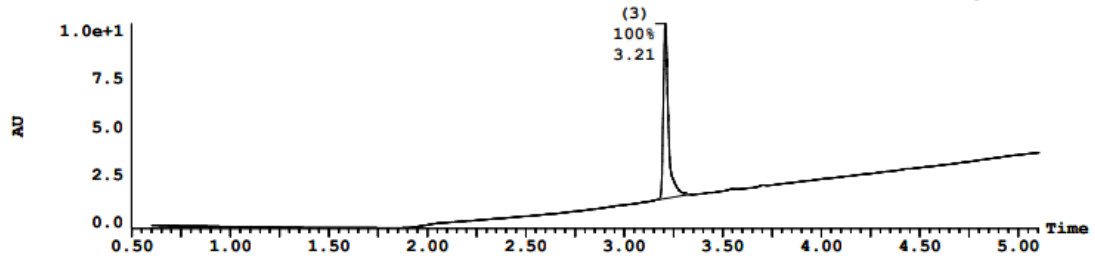

13.368  
10.453  
9.133  
9.119  
9.105  
8.608  
8.157  
8.137  
8.133  
7.624  
7.603  
7.448  
7.429  
7.410  
7.283  
7.264  
7.245  
6.509  
6.484  
6.467  
6.442  
6.347  
6.304  
6.299  
5.824  
5.820  
5.799  
5.795  
4.083  
4.077  
4.070  
4.064  
3.324  
3.130  
3.124  
3.117  
2.492  
2.487  
2.483  
1.210

IB-1-24\_3\_H 23.08.2020

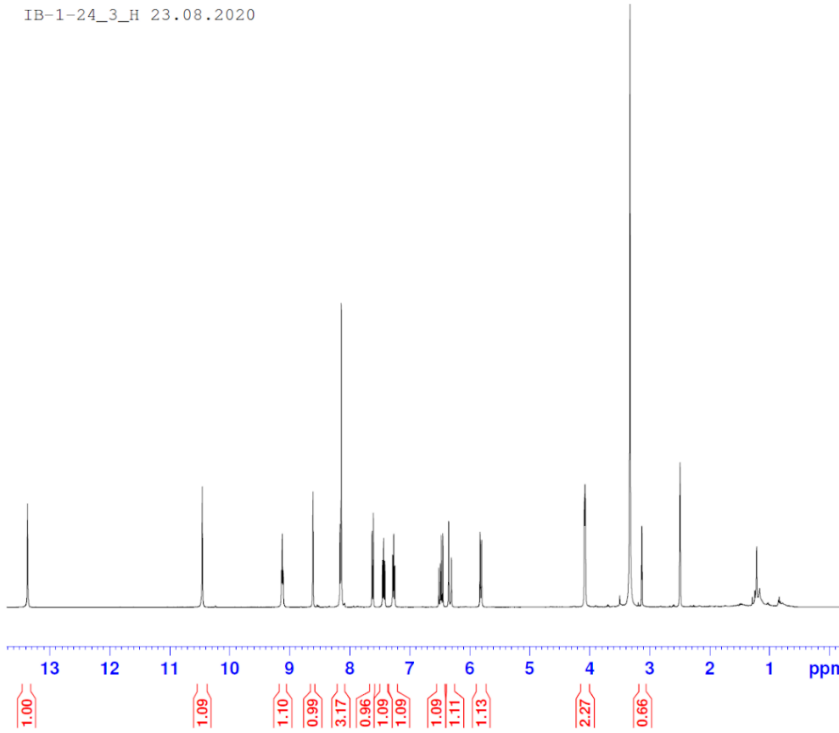

```
Current Data Parameters
NAME      IB-1-24_3_H
EXPNO    1
PROCNO   1

F2 - Acquisition Parameters
Date_    20200824
Time     12:36
INSTRUM  spect
PROBHD   5 mm PABBO BB/
PULPROG  zg
TD        16384
SOLVENT  DMSO
NS        6
DS        0
SWH       7211.539 Hz
FIDRES    0.440157 Hz
AQ        1.1359574 sec
RG        163.28
DW        69.333 usec
DE        6.50 usec
TE        298.0 K
D1        2.00000000 sec
TDO       1

===== CHANNEL f1 =====
SFO1     400.3545018 MHz
NUC1     1H
P1       13.00 usec
PLW1    18.50000000 W

F2 - Processing parameters
SI       32768
SF       400.3525083 MHz
WDW      EM
SSB      0
LB       0.50 Hz
GB       0
PC       1.00
```

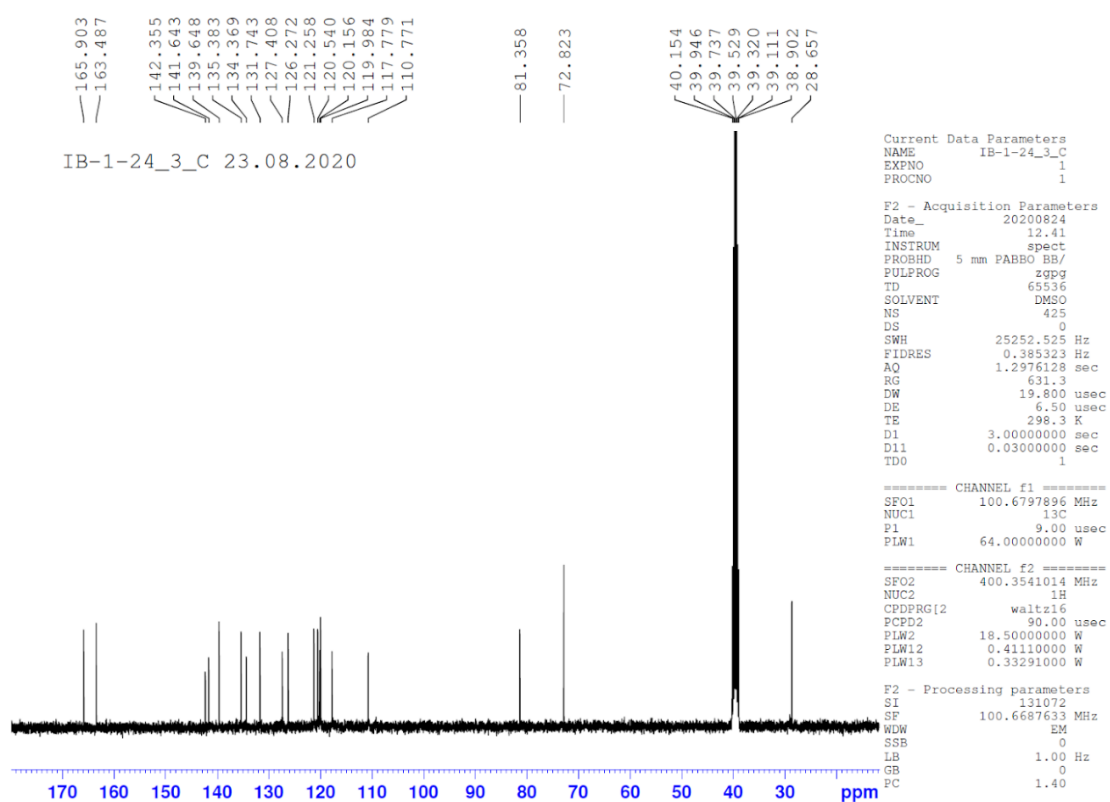

**Rac-3-acrylamido-5-(1H-indazol-3-yl)-N-((1-((*trans*)-2-methoxycyclohexyl)-1H-1,2,3-triazol-4-yl)methyl)benzamide (2a)**

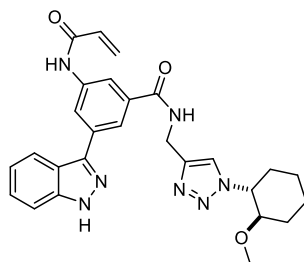

UPLC-MS chromatogram (averaged from 200 – 498 nm)

PG319 f6

2: Diode Array  
Range: 1.188e+1

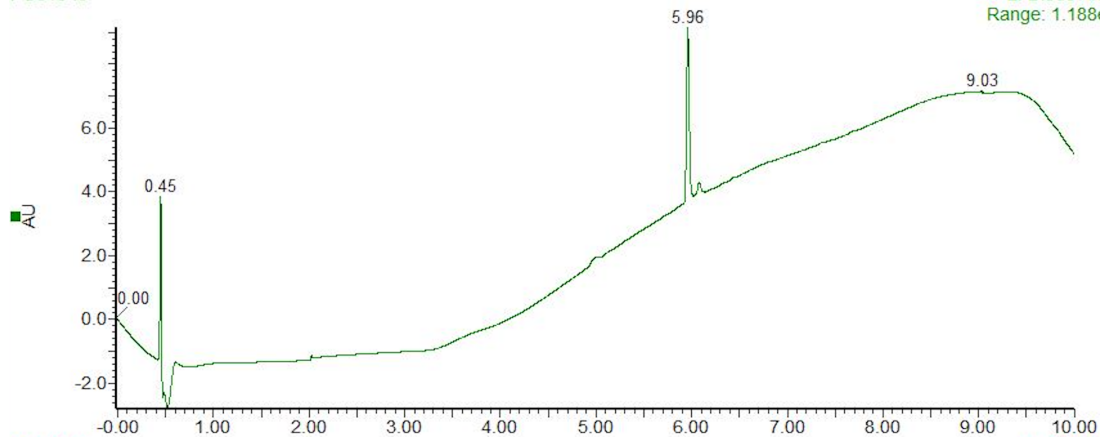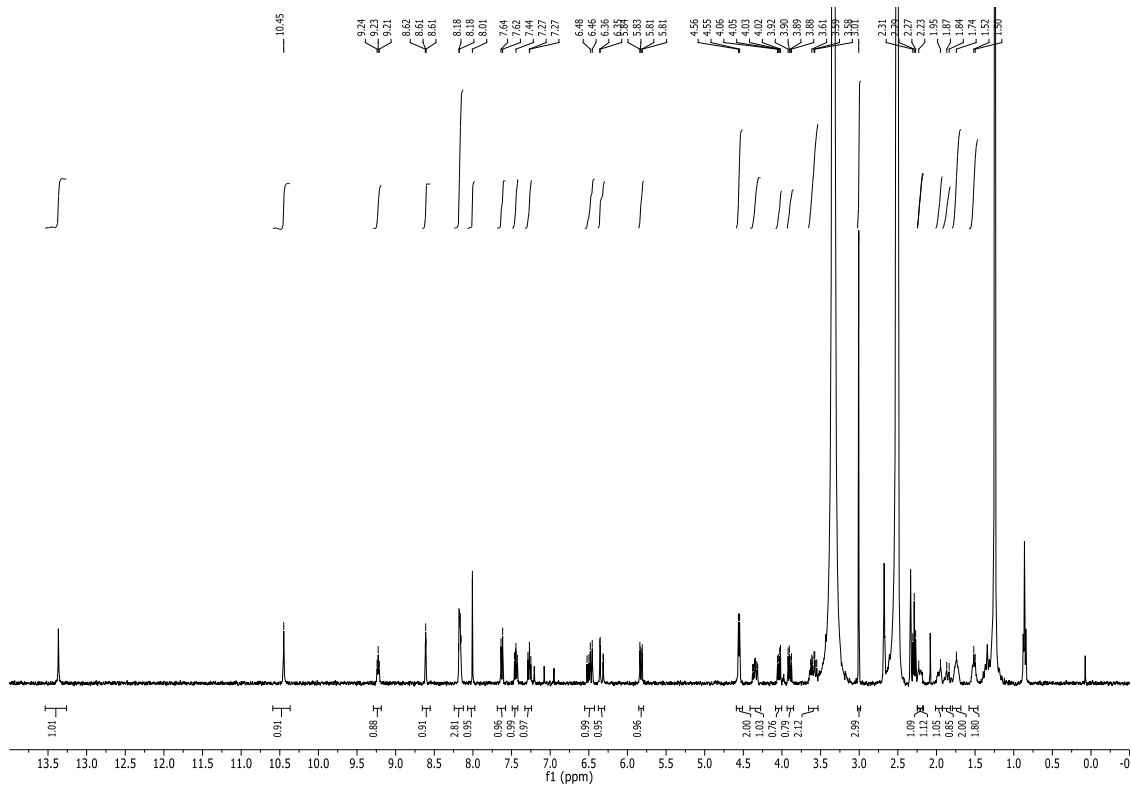

3-acrylamido-5-(1H-indazol-3-yl)-N-((1-(o-tolyl)-1H-1,2,3-triazol-4-yl)methyl)benzamide (2b)

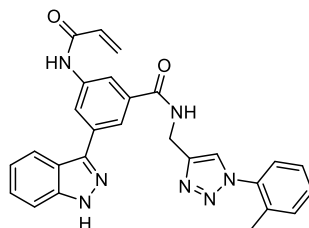

UPLC-MS chromatogram (averaged from 200 – 498 nm)

PG322 f34

2: Diode Array  
Range: 5.795e+1

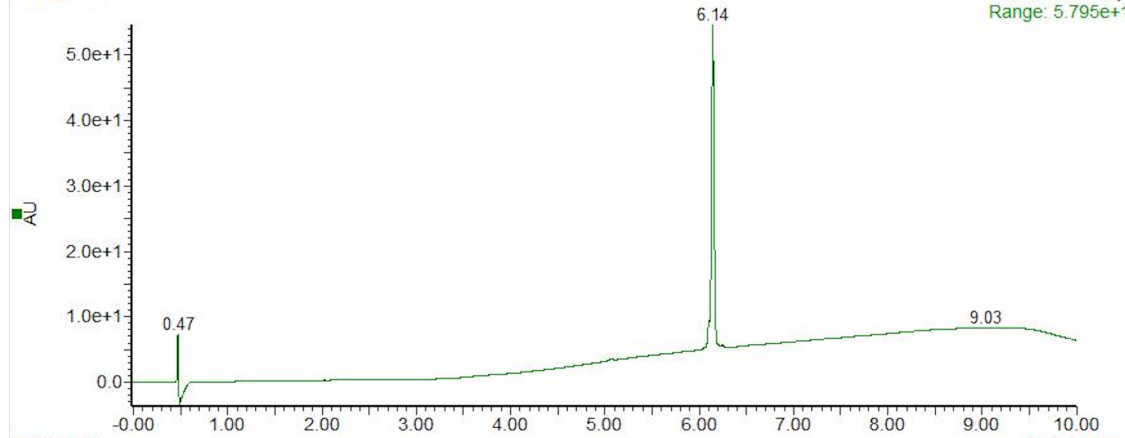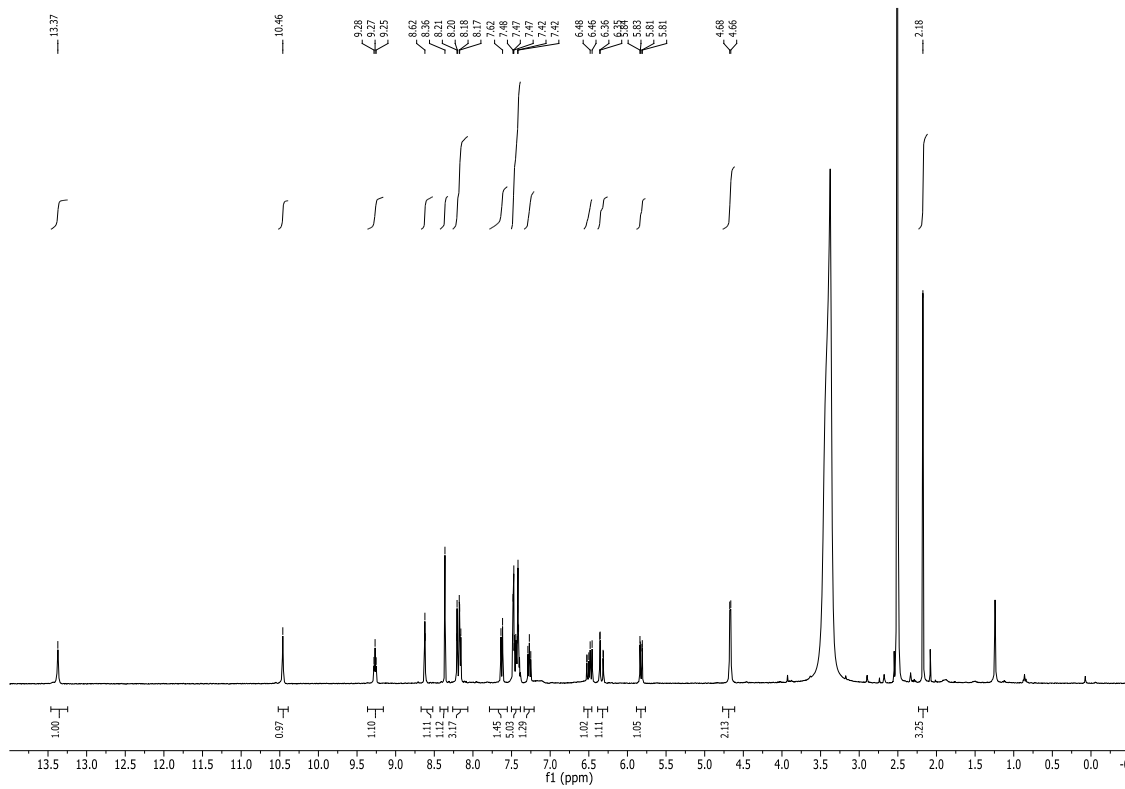



**3-acrylamido-N-((1-cyclobutyl-1H-1,2,3-triazol-4-yl)methyl)-5-(1H-indazol-3-yl)benzamide (2c)**

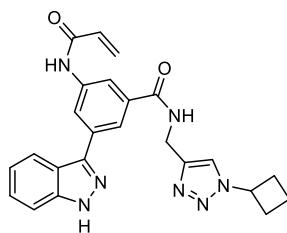

UPLC-MS chromatogram (averaged from 200 – 498 nm)

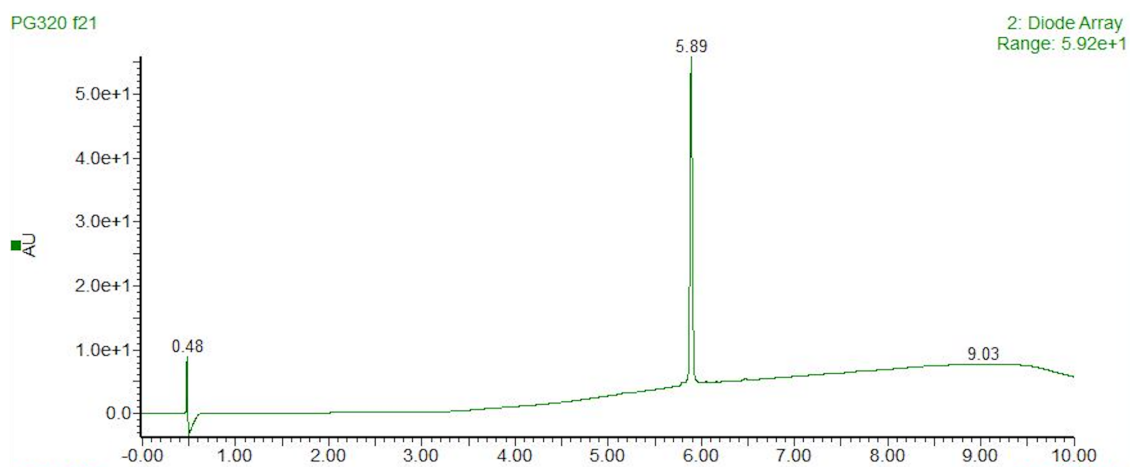

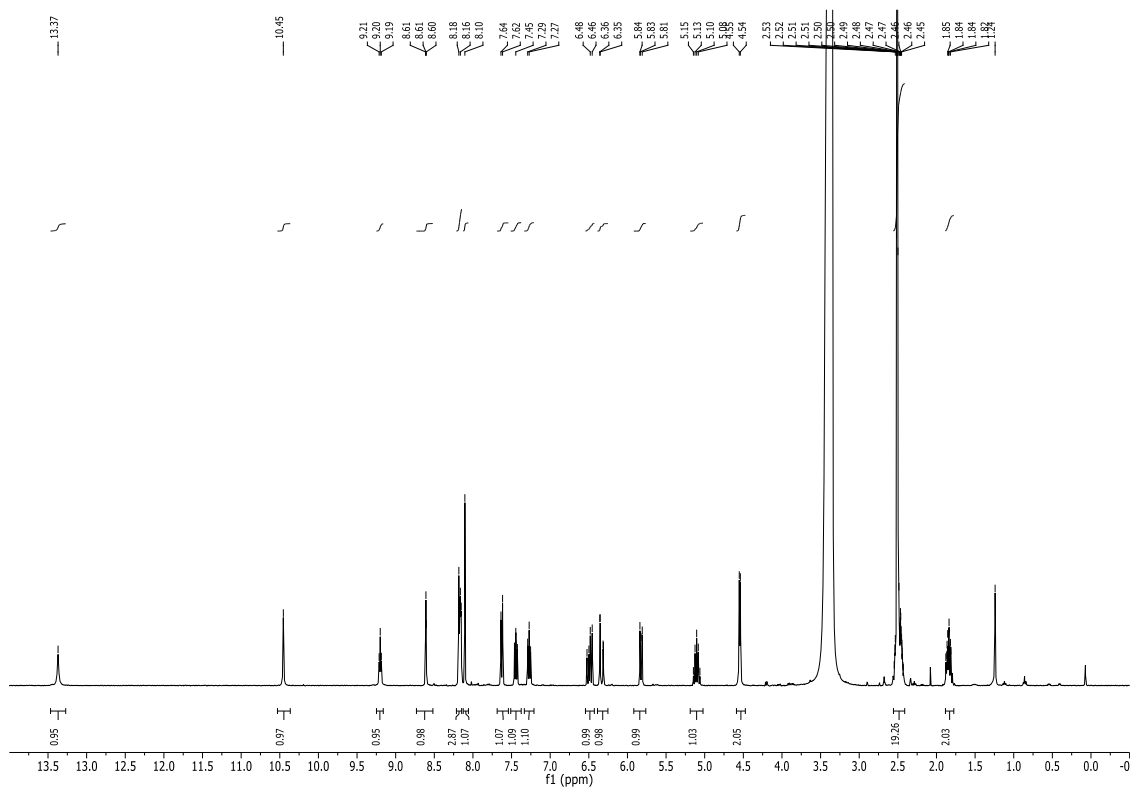

**3-acrylamido-5-(1H-indazol-3-yl)-N-((1-(2-methoxyethyl)-1H-1,2,3-triazol-4-yl)methyl)benzamide (2d)**

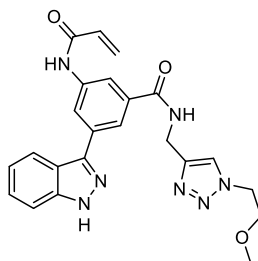

UPLC-MS chromatogram (averaged from 200 – 498 nm)

PG323 f39

2: Diode Array  
Range: 3.717e+1

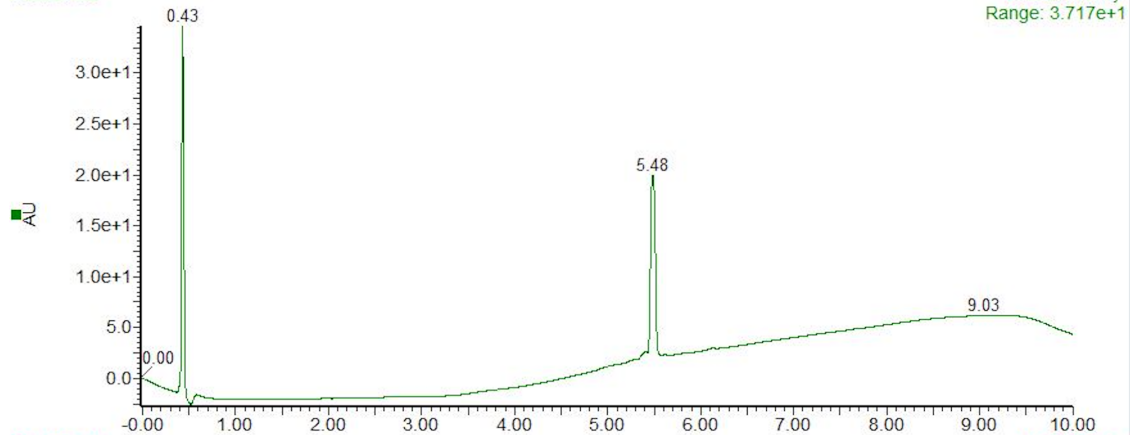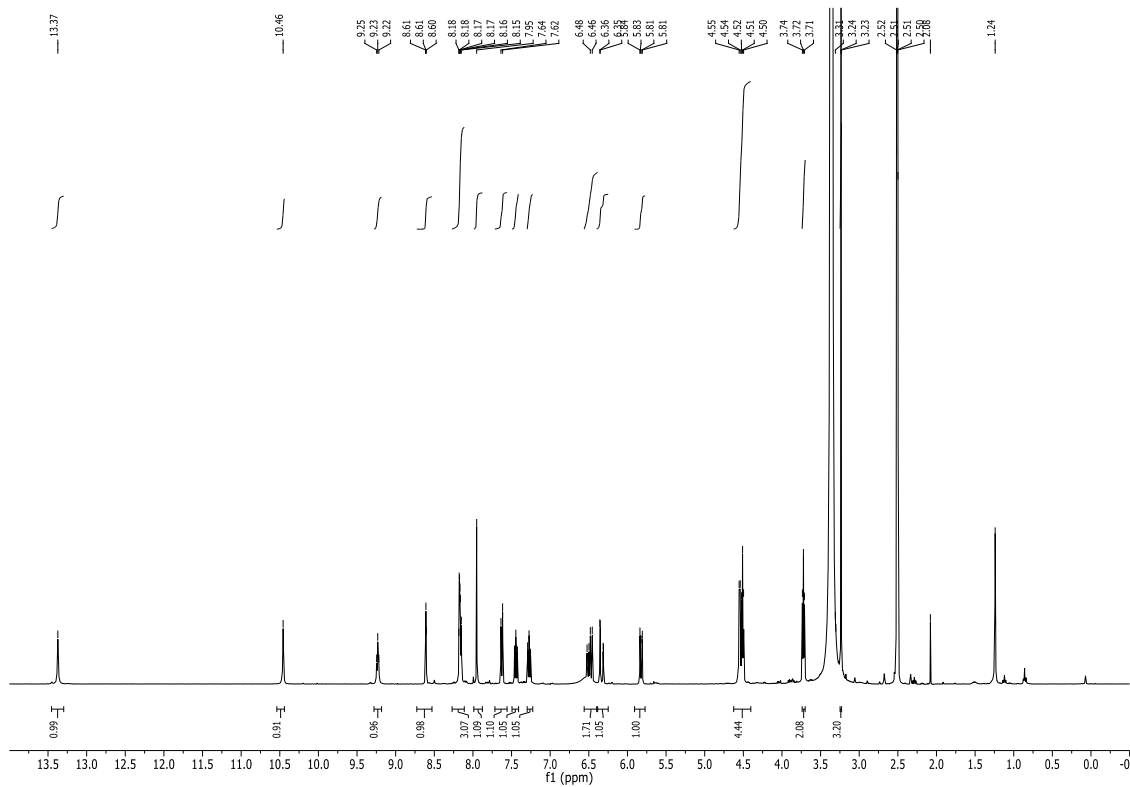

**3-acrylamido-N-((1-(3-chloro-4-fluorophenyl)-1H-1,2,3-triazol-4-yl)methyl)-5-(1H-indazol-3-yl)benzamide (2e)**

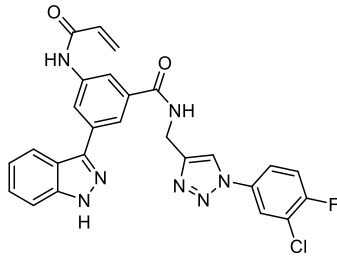

UPLC-MS chromatogram (averaged from 200 – 498 nm)  
PG321 f16

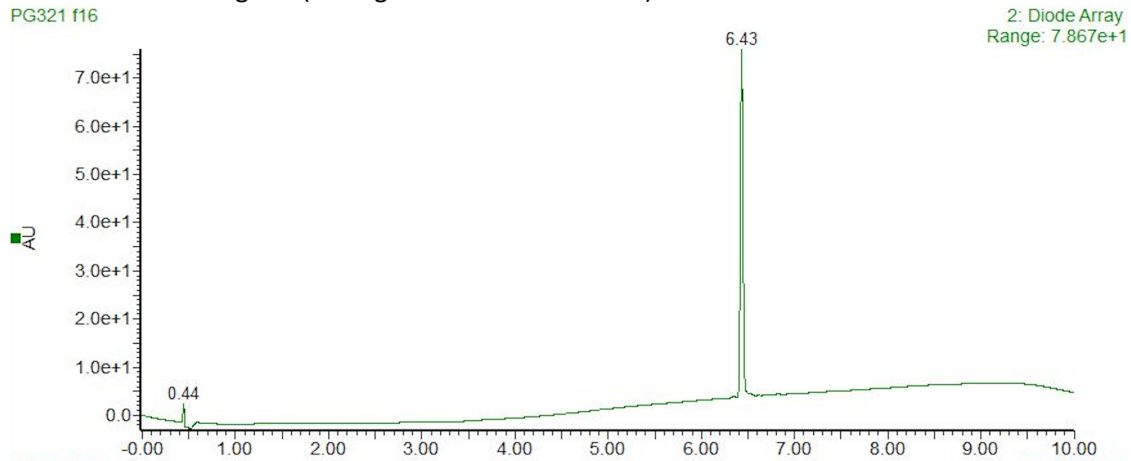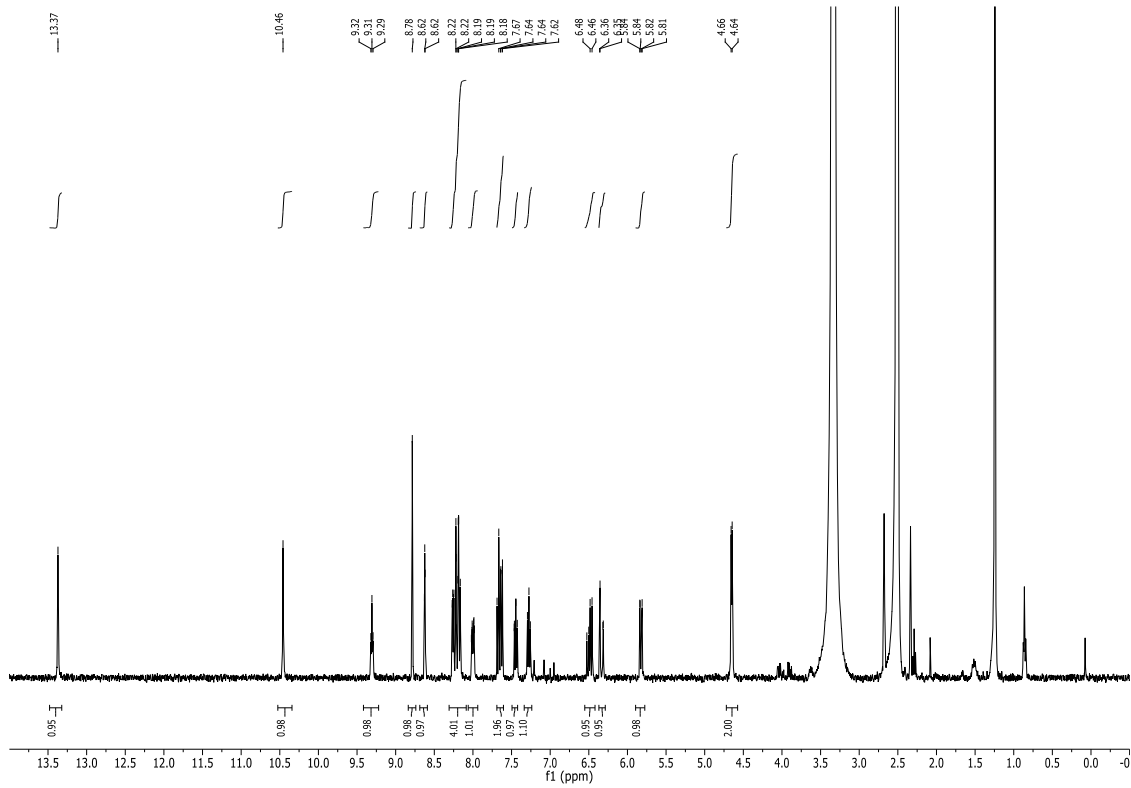

Supplement: jm1c02206_si_001.pdf [file jm1c02206_si_001.pdf]
